1 **TITLE:** Specimen alignment with limited point-based homology: 3D morphometrics of  
2 disparate bivalve shells (Mollusca: Bivalvia)

3 **RUNNING HEAD:** Aligning bivalve shells

4 **KEYWORDS:** marine bivalve, shell shape, geometric morphometrics, 3D morphometrics,  
5 anatomical homology

6 **AUTHORS:** Stewart M. Edie<sup>1\*</sup>, Katie S. Collins<sup>2</sup>, David Jablonski<sup>3,4</sup>

7 <sup>1</sup> Department of Paleobiology, National Museum of Natural History, Smithsonian Institution,  
8 Washington, DC, 20013, U.S.A.

9 <sup>2</sup> Natural History Museum, London, London, SW7 5BD, United Kingdom

10 <sup>3</sup> Department of the Geophysical Sciences, University of Chicago, 5734 South Ellis Ave,  
11 Chicago, IL 60637, USA.

12 <sup>4</sup> Committee on Evolutionary Biology, University of Chicago, Chicago, IL 60637, USA

13 \* corresponding author

14

## 15 **1. Abstract**

16 Comparative morphology fundamentally relies on the orientation and alignment of specimens. In  
17 the era of geometric morphometrics, point-based homologies are commonly deployed to register  
18 specimens and their landmarks in a shared coordinate system. However, the number of point-  
19 based homologies commonly diminishes with increasing phylogenetic breadth. These situations  
20 invite alternative, often conflicting, approaches to alignment. The bivalve shell (Mollusca:  
21 Bivalvia) exemplifies a homologous structure with few universally homologous points—only  
22 one can be identified across the Class, the shell ‘beak.’ Here, we develop an axis-based  
23 framework, grounded in the homology of shell features, to orient shells for landmark-based,  
24 comparative morphology. As the choice of homologous points for alignment can affect shape  
25 differences among specimens, so can the choice of orientation axes. Analysis of forty-five  
26 possible alignment schemes finds general conformity among the shape differences of ‘typical’  
27 equilateral shells, but the shape differences among atypical shells can change considerably,  
28 particularly those with distinctive modes of growth. Each alignment implies a hypothesis about  
29 the ecological, developmental, or evolutionary basis of morphological differences, but we  
30 recognize one alignment in particular as a continuation of the historical approaches to  
31 morphometrics of shell form: orientation via the hinge line. Beyond bivalves, this axis-based

32 approach to aligning specimens facilitates the comparison of continuous differences in shape  
33 among many other phylogenetically broad and morphologically disparate samples.

## 34 **2. Introduction**

35 Comparative morphology depends on how organisms are oriented, or aligned. For a simplistic  
36 example, a kiwi's beak is relatively long for a bird when measured from the tip to the base of the  
37 skull, but rather short when measured from the tip to the nostrils (an alternative definition of  
38 beak length; Borrás et al. 2000). Thus, the choice of anatomical reference points can profoundly  
39 alter our interpretations of evolutionary morphology. Alignments commonly use point-based  
40 aspects of homologous features—the junction of the kiwi's beak with the cranium (a Type I  
41 landmark; Bookstein 1992) and the distal-most point of the beak, the tip (a Type III landmark).  
42 Closely related organisms tend to have more of these homologous points, allowing for a  
43 straightforward alignment and comparison of their shapes. Alignment on strict, point-based  
44 homology becomes more problematic with increasing phylogenetic distance, however, as the  
45 number of homologous features invariably diminishes (Bardua et al. 2019).

46 Bivalve mollusks have become a model system for macroevolution and macroecology  
47 (Jablonski et al. 2017; Edie et al. 2018; Crame 2020), but their strikingly disparate body plans  
48 complicate Class-wide morphologic comparisons using strict homology (Cox et al. 1969).  
49 Inimical to triangulation and thus alignment via landmarks, the valve of the bivalve shell—the  
50 most widely available feature of the animal today and through the fossil record—has only one  
51 homologous *point*: the apex of the beak, which is the origin of growth of the embryonic shell at  
52 the apex of the beak (Carter et al. 2012:21; Figure 1). Homology-free approaches can be useful  
53 for comparing the shapes of shell valves when anatomical orientation is either unknown or  
54 uncertain (Bailey 2009); but wholesale substitution of shape, i.e. analogy, for homology  
55 complicates the evolutionary interpretation of morphological differences. Despite the lack of  
56 multiple homologous *points* on the shell valve across the Class, a number of its *features* are  
57 homologous and can facilitate comparisons. Here, we apply principles of bivalve comparative  
58 morphology to develop a framework for aligning shell valves (hereafter 'shells') across the Class,  
59 thus enabling phylogenetically extensive analyses of their shapes using geometric morphometrics  
60 despite the remarkable range of body plans across the clade.

### 61 **2.1 Approaches to orienting the bivalve shell**

62 Many body directions, axes, lines, and planes have been defined for bivalves (see Cox et al.  
63 1969; Bailey 2009; Carter et al. 2012)—some related to features of the shell (an accretionary  
64 exoskeleton composed of calcium carbonate; Marin et al. 2012), and others to features of the soft  
65 body (the digestive tract, foot, byssus, muscles, etc.). Separation into these 'shell' and 'body'

66 terms is a false (Stasek 1963a) but convenient dichotomy (Yonge 1954): the shell is generated  
67 by, and remains attached to, the soft body, but their morphologies can become decoupled (Yonge  
68 1954; Edie et al. 2022). Still, both shell and body features are required for orientation via  
69 homology (Stasek 1963a; cf. Bailey 2009). Given our goal of aligning the shell for geometric  
70 morphometrics across broad phylogenetic scales and through the fossil record, we focus on  
71 orientations that can be inferred from this part alone, but we must use a critical body axis to fully  
72 determine orientation, the anteroposterior axis. Thus, shell features used for alignment can be  
73 divided into two classes: (1) intrinsic characteristics of the shell relating to its geometry, growth,  
74 and biomechanics, and (2) proxies of the body recording the positions of the soft anatomy  
75 including the adductor muscle scars, pallial line, byssal notch, pedal gape, siphon canal, and  
76 more.

### 77 **2.1.1 Orientation via intrinsic characteristics of the shell**

78 Although the only homologous point on the shell across all bivalves is the apex of the beak  
79 (hereafter 'beak', Figure 1), aspects of the shell's biomechanics, such as its hinge axis, and its  
80 accretionary growth permit orientation via homology. The planes and lines proposed to describe  
81 shell geometry and growth have been criticized for their lack of homology (Stasek 1963b:226)  
82 and ubiquity across the class (Lison 1949:62; Owen 1952:149; Carter 1967:272). We discuss two  
83 such features here, the directive plane and demarcation line (Figure 1 and defined below), but we  
84 also address and test two alternative means of orienting shells that combine the shell's geometry  
85 and growth: the maximum growth axis and the shape of the shell commissure.

86 Related to the shell's biomechanics, the hinge has been treated as a "fixed dorsal region"  
87 (Yonge 1954:448; see also Jackson 1890:282), later redefined to reflect the position of the  
88 mantle isthmus bridging between the two valves as a universally dorsal-directed feature (Cox et  
89 al. 1969:79). Beyond its determination of dorsoventral directionality, the hinge, specifically the  
90 hinge axis defined as the "ideal line drawn through the hinge area, and coinciding with the axis  
91 of motion of the valves" (Jackson 1890:309), is a Class-wide feature that can constrain one of the  
92 three Cartesian axes required for alignment. In a strictly mechanical sense, the ligament, and not  
93 the hinge teeth, directs the orientation of the axis of motion (Trueman 1964:56; Cox et al.  
94 1969:47; Stanley 1970:47). However, the hinge area, which includes the teeth, is hypothesized to  
95 be analogous in function (Cox et al. 1969:47)—guiding the two valves into alignment during  
96 closure—and homologous in its origin (Scarlato and Starobogatov 1978; Waller 1998; Fang and  
97 Sanchez 2012). Thus, our definition of the **hinge line** indicates the longest dimension of the  
98 hinge area (see 'hinge' in Carter et al. 2012:74 and Figure 1); for quantitatively aligning shells,  
99 the hinge line is determined by the two farthest apart articulating elements of the hinge area,  
100 excluding lateral teeth, which are variably present among heterodont species (e.g. Mikkelsen et

101 al. 2006:493; Taylor and Glover 2021); definition proposed here is a synthesis of the discussions  
 102 in Cox et al. 1969:81 and Bradshaw and Bradshaw 1971). Thus, by directing the orientation of  
 103 the horizontal plane which divides the body into dorsal (towards the beak) and ventral (towards  
 104 the free edge of the shell) territories, the hinge line can also proxy the anteroposterior axis  
 105 (Figure 1, Cox et al. 1969:81 and discussion below).

106

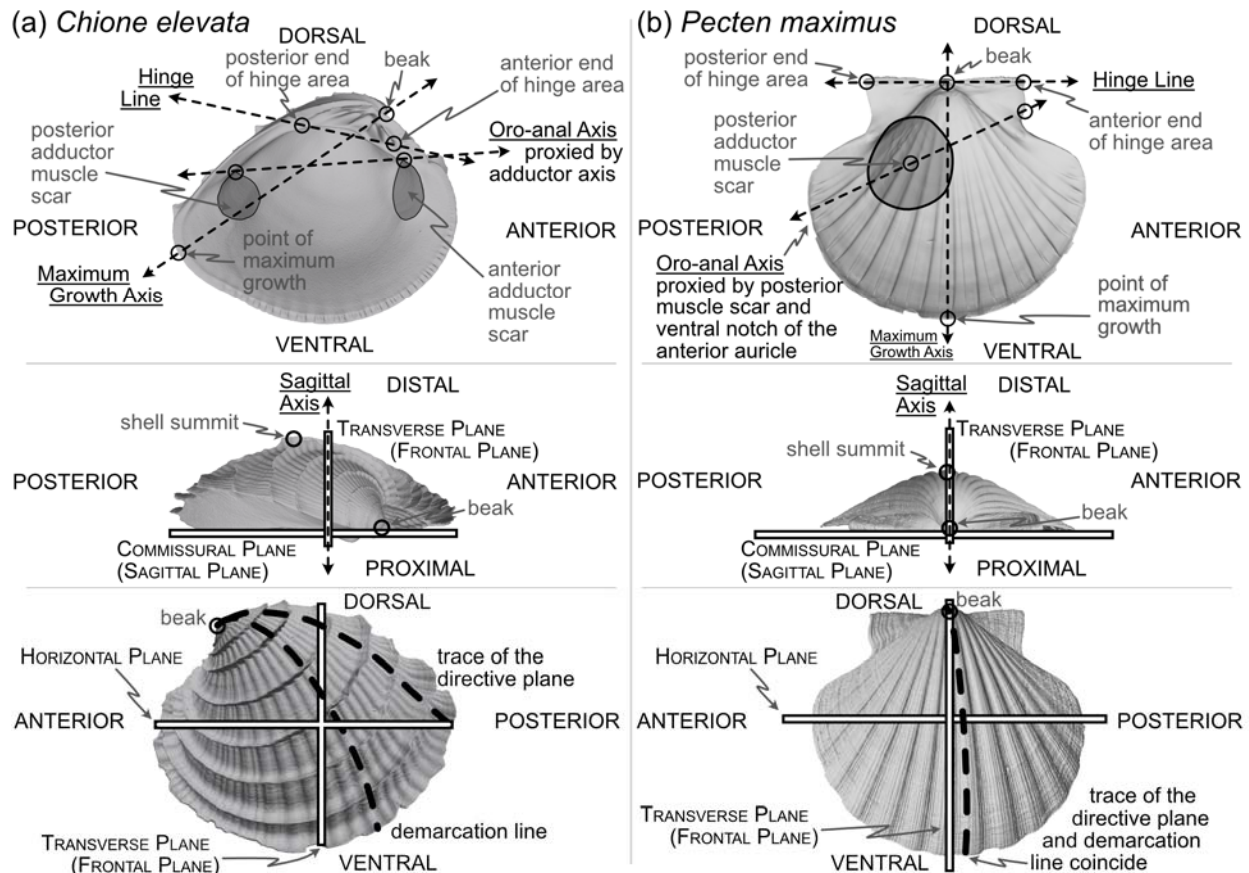

107

108 **Figure 1.** Positions of shell features, axes, and planes as mentioned and defined in text for: (a) a  
 109 helicospiral shell *Chione elevata* (Say 1822), and (b) a more planispiral shell *Pecten maximus*  
 110 (Linnaeus 1767).

111 Related to the geometry and growth of the shell, the **directive plane** (Lison 1949) was  
 112 proposed as the only plane passing through the shell that contains the logarithmic planispiral line  
 113 connecting the beak to a point on the ventral margin (Figure 1); all other radial lines would be  
 114 logarithmic turbinate spirals (or 'helicospirals'; Stasek 1963b:217). In other words, on a radially  
 115 ribbed shell, there may be a single rib that lies entirely on a plane when viewed from its origin at  
 116 the umbo to its terminus on the ventral margin; that plane is orthogonal to the commissural plane

117 for planispiral shells (e.g. many Pectinidae, Figure 1), but lies at increasingly acute angles to the  
118 commissural plane with increasing tangential components of growth (i.e. geometric torsion; see  
119 the trace of the directive plane on *Chione* in Figure 1 and examples in Cox et al. 1969:86-Figs.  
120 70-71). In theory, the directive plane could be used to orient the dorsoventral axis of the shell,  
121 but in practice, the feature is not universal across shell morphologies (e.g. the strongly coiled  
122 *Glossus humanus* [as *Isocardia cor*] in Lison 1949:62; Owen 1952:149). Cox et al. (1969:87)  
123 also remark that the plane cannot "be demonstrated easily by visual inspection if the shell lacks  
124 radial ribbing, except in rare specimens with an umbonal ridge that proves to lie within the  
125 directive plane." Difficulty in application is no excuse to avoid an approach, but the non-  
126 universality of this feature renders it inapplicable to Class-wide comparisons of shell shape.

127 Owen (1952) proposed an alternative to the directive plane: the **demarcation line**  
128 (Figure 1; originally termed the 'normal axis' but re-named by Yonge 1955:404). As with the  
129 directive plane, the demarcation line serves to orient the dorsoventral direction and separate the  
130 shell into anterior and posterior 'territories' (Yonge 1955:404; Morton and Yonge 1964:40), but  
131 its definition has been variably characterized in geometric and/or anatomical terms. Per Owen  
132 (1952:148), the demarcation line can "be considered with reference to three points: the umbo, the  
133 normal zone of the mantle edge and the point at which the greatest transverse diameter of the  
134 shell intersects the surface of the valves." Yonge (1955:404), acknowledging correspondence  
135 with Owen, described the demarcation line as: "the projection onto the sagittal plane of the line  
136 of maximum inflation of each valve ... starting at the umbones. ... i.e. the region where the ratio  
137 of the transverse to radial component in the growth of the mantle/shell is greatest." Carter et al.  
138 (2012:52) provided perhaps the clearest description as the line defining the "dorsoventral profile  
139 when the shell is viewed from the anterior or posterior end." However, Stasek (1963b)  
140 demonstrated the difficulty in measuring this line; note the nearly orthogonal orientations of the  
141 empirically determined demarcation line on *Ensis* (Stasek 1963b:225-Fig.5a) compared to its  
142 initially proposed position (Owen 1952:148-Fig. 5). Stasek's empirical approach, coupled with  
143 the revised definition of Carter et al., is tractable with today's 3D-morphology toolkit. But,  
144 critically, this definition depends on the direction of the anteroposterior axis, which itself is  
145 variably defined (see discussion in next section). Thus, definitionally driven shifts in the  
146 direction of the anteroposterior axis can alter the trace of the demarcation line. Owen's initial  
147 definition is independent of the anteroposterior axis, but as Stasek demonstrated, its  
148 identification can be unreliable. Thus, high degrees of digitization error for the demarcation line  
149 may confound comparisons of shell shape, and we do not include the demarcation line as a  
150 feature for aligning shells across the Class.



151 Both the directive plane and the demarcation line attempt to orient the shell on aspects of  
152 its geometry that are intrinsic to its growth. A similar and more reliably determined approach  
153 may be orientation to the **maximum growth axis** (i.e. **line of greatest marginal increment**  
154 sensu Owen 1952; Figure 1). The maximum growth axis is the straight line that connects the  
155 origin and terminus of the trace of maximum growth across the shell surface. This trace connects  
156 the beak to the ventral margin along a perpendicular path to the most widely spaced  
157 commarginal growth increments (as such, this definition appears to have similar properties to the  
158 trace of the directive plane on the shell surface). But, as for the directive plane and the  
159 demarcation line, the maximum growth axis can be prone to measurement error without fitting a  
160 formal model of shell growth (e.g. those of Savazzi 1987; Ubukata 2003), and should therefore  
161 be used with caution. However, a reasonable and reliably measured proxy for this axis is the line  
162 lying on the commissural plane that originates at the beak and terminates at the furthest point on  
163 the shell commissure. Thus, this axis can indicate the dorsoventral orientation of the shell.

164 Orientation using the **shape of the shell commissure** offers, arguably, the most reliably  
165 determined approach that uses intrinsic properties of the shell (Figure 2a). Given the accretionary  
166 growth of the shell, points on the commissure—the homologous leading edge of shell growth  
167 (Vermeij 2013)—are geometrically homologous, or correspondent (Bookstein 1991; Gunz et al.  
168 2005). Valve handedness is still required to ensure that compared valves are from the same side  
169 of the body (i.e. left vs. right), which requires anteroposterior directionality (see below). This  
170 alignment thus orients shells using geometric correspondence based on homology of growth.

171 The sagittal axis is crucial to the shell's three-dimensional alignment and is likely the  
172 least controversially defined. This axis is the pole (=normal) to the sagittal plane, which lies  
173 parallel to the commissural plane defined as: "the more proximal part of the line or area of  
174 contact of the two shell valves" (Carter et al. 2012:38). Therefore, the sagittal axis is parallel to  
175 the frontal and horizontal planes (Figure 1). The proximal direction is towards the commissural  
176 plane and the distal direction is towards the shell's summit: the point on the shell that is  
177 maximally distant from the commissural plane (Figure 1, Cox et al. 1969:108; Carter et al.  
178 2012:177). If valve handedness (i.e. left vs. right laterality) and the directionality of the  
179 dorsoventral and anteroposterior axes are known, then this axis is rarely required for orientation.  
180 However, certain definitions of the anteroposterior and dorsoventral axes are not constrained to  
181 be orthogonal (e.g. in monomyarian taxa with the anteroposterior axis defined as the oro-anal  
182 axis, see below, and the dorsal ventral axis as the axis of maximum growth—*Pecten* in Figure 1);  
183 as the axes representing the anteroposterior and dorsoventral directions become more parallel,  
184 then the sagittal axis becomes an increasingly important safeguard against the inversion of the  
185 proximal-distal direction in quantitative alignments.

## 186 2.1.2 Orientation via the soft-body as reflected on the shell

187 Anteroposterior directionality is the third Cartesian axis required for orienting the bivalve shell  
188 in three-dimensions. The positions of the mouth (anterior) and anus (posterior) ultimately  
189 determine the anteroposterior axis (Jackson 1890, 'preferably' described as the 'oro-anal' axis in  
190 Cox et al. 1969:79), but the exact positions of these two soft-body features are rarely recorded  
191 directly on the shell. Thus, tactics for determining the polarity, if not the precise bearing, of the  
192 anteroposterior axis have relied on lineage or body-plan specific proxies—shell features that are  
193 assumed to correlate with positions of the soft-body anatomy (e.g. positions of the adductor  
194 muscle scars, Figure 1a, Cox et al. 1969:79). Disparate body plans necessitate taxon-specific  
195 rules for orientation, such that determining the anterior and posterior ends of the shell requires a  
196 mosaic approach. For example, there are at least three definitions of the anteroposterior axis in  
197 dimyarians alone (Bailey 2009:493), which necessarily differ from those of monomyarians  
198 considering the reliance on two, instead of one, adductor muscle scars. For those monomyarians,  
199 which commonly have lost the anterior adductor (Yonge 1954; but see loss of the posterior  
200 adductor in the protobranch Nucinellidae, Allen and Sanders 1969; Glover and Taylor 2013),  
201 additional shell features are used to orient the anteroposterior axis. In pectinids, the byssal notch  
202 of the anterior auricle proxies the location of the mouth (Figure 1b), but in ostreids, the mouth is  
203 more centrally located under the umbo, near the beak (Yonge 1954:448).

204 Lineage or body-plan specific definitions help with anteroposterior orientation of shells  
205 that lack point-based homology (e.g. two muscle scars vs. one), but they still rely on proxies for  
206 the position of soft-body features that may not be determined for taxa known only from their  
207 shells, e.g. some fossils (Bailey 2009). Hypothesizing anteroposterior orientation using  
208 phylogenetic proximity to extant clades may help, but this approach should be used with caution  
209 in given the lack of direct anatomical evidence—especially when phylogenetic affinities are  
210 either unknown or distant, as for many Paleozoic taxa (Bailey 2009). Nor is it advisable to  
211 assume the precise bearing of the anteroposterior axis is identical to another, well-defined axis  
212 such as the hinge line (see variable bearings of the anteroposterior axis and hinge *axis* in Cox et  
213 al. 1969:80-Fig. 64). However, if the phylogenetic or temporal scope of an analysis precludes the  
214 determination of the anteroposterior axis using homologous body features with geometric  
215 correspondences (e.g. inclusion of dimyarian and monomyarian taxa), then the hinge line offers a  
216 universal proxy; that way, multiple features can be used to determine the anterior and posterior  
217 ends of the shell (Cox et al. 1969).

## 218 2.2 Alignment of shells for geometric morphometrics

219 Our challenge here is to reconcile the many means of orienting bivalve shells discussed above  
220 into alignment schema for geometric morphometrics. We compare the differences in shell shape  
221 produced by the five orientations listed below. All five orientations use the sagittal axis (SX) to  
222 determine the lateral orientation of the shell. Precise definitions of landmark placement for each  
223 axis are provided in the Methods.

- 224 ● **SX-HL-oHL.** Anteroposterior orientation determined by the hinge line (HL);  
225 dorsoventral orientation determined by the orthogonal line to the HL within the  
226 commissural plane (oHL). This alignment emulates the orientation scheme for measuring  
227 shell height, length, and width—the most common and widely applicable framework for  
228 comparing shell morphology (Cox et al. 1969:81–82; Kosnik et al. 2006).
- 229 ● **SX-OAX-oOAX.** Anteroposterior orientation determined by the proxied positions of the  
230 mouth and anus using shell features (oro-anal axis, OAX); dorsoventral orientation  
231 determined by the orthogonal line to the OAX within the commissural plane (oOAX).  
232 Similar to SX-HL-oHL, this alignment largely determines orientation by a single axis, the  
233 OAX, which has also been used to frame linear measurements of shell morphology (e.g.  
234 Stanley 1970:19).
- 235 ● **SX-HL-GX.** Anteroposterior orientation determined by the hinge line (HL); dorsoventral  
236 orientation determined by the maximum growth axis (GX). This alignment allows an  
237 aspect of shell growth to affect its orientation and thus the degrees of morphological  
238 similarity among specimens.
- 239 ● **SX-HL-GX-OAX.** Anteroposterior orientation determined by the directions of both the  
240 HL and OAX; dorsoventral orientation determined by GX. This 'full' alignment scheme  
241 allows axes derived from intrinsic characteristics of the shell and the body to affect  
242 orientation.
- 243 ● **SX-COMM.** Anteroposterior and dorsoventral orientation determined by the shape of the  
244 commissure curve, with the initial point nearest the beak (Figure 2a). This alignment uses  
245 the geometric correspondence of semilandmarks on the commissure that capture the  
246 relationship between its shape and growth.

247 Procrustes superimposition (or Procrustes Analysis) is the workhorse of geometric  
248 morphometrics—aligning shapes by translation to a common origin, scaling to common size, and  
249 rotation to minimize relative distances of landmarks (see variants thereof in Zelditch et al. 2012).  
250 While we are most concerned with assessing the effects of rotation using the five alignments  
251 described immediately above, choices of translation and scaling can also influence shape  
252 differences. Thus, we consider all combinations of parameter values for each step in the



253 Procrustes Analysis. As there is arguably no objective criterion to determine which alignment  
254 best suits bivalve shells, we discuss the benefits and drawbacks of each approach and  
255 quantitatively compare the similarities of resulting alignments. Ultimately, we use this exercise  
256 to propose a best practice for aligning bivalve shells and comparing their shapes—a process that  
257 may be of use for workers in other, similarly disparate morphological systems that lack high  
258 degrees of point-based homology.

### 259 **3. Methods**

#### 260 **3.1 Dataset**

261 We adopt the style of previous approaches to studying bivalve orientation and use a dataset of  
262 morphological end-members to illustrate the effects of different alignment schemes (e.g. Owen  
263 1952; Yonge 1954; Stasek 1963a). Eleven species that represent most major body plans were  
264 selected to proxy the morphological and anatomical disparity across the evolutionary history of  
265 the Class (Table S1). Bivalves with highly reduced shells or those that form part of a larger  
266 structure (tubes and crypts) are not directly analyzed here, but we consider their fit to the  
267 alignments in the Discussion.

268 One valve from an adult individual of each species was sampled from museum  
269 collections (see Acknowledgments). Nine of eleven individuals are equivolume, and because we do  
270 not examine details of dentition, their left and right valves are operationally mirror images of  
271 each other. The inequivalve taxa included here (*Pecten*, *Ostrea*) primarily differ in terms of  
272 inflation (height above the commissural plane); for the purposes of our analysis, the location of  
273 key features such as the hinge area and adductor muscle scars are similar enough that using  
274 either valve gives a similar orientation. Valves were scanned using micro-CT at the University of  
275 Chicago's Paleo-CT facility, and three-dimensional, isosurface, triangular-mesh models were  
276 created in VG Studio Max and cleaned in Rvcg (Schlager 2017) and Meshmixer. Landmarks  
277 were placed using 'Pick Points' in Meshlab (Visual Computing Lab ISTI – CNR 2019). Meshes,  
278 landmarks, and code necessary to reproduce the analyses here are provided in the Supplemental  
279 Material.

#### 280 **3.2 Aligning bivalve shells in a geometric morphometrics framework**

##### 281 **3.2.1 Scaling**

282 Procrustes Analysis scales objects to a common size, and three alternative scalings are  
283 considered here: (1) the **centroid size of the shell** (Figure 2b), (2) the **centroid size of the**  
284 **commissure** (Figure 2a), and (3) the **volume of the shell**. The centroid size of the shell reflects  
285 the 3D footprint of the shell, and the centroid size of the commissure reflects the size of the

286 shell's growth front. Shell volume—the amount of calcium carbonate—may be less correlated  
287 with shell shape than the other two measures, and may therefore reveal shape differences not  
288 intrinsically linked to size.

### 289 3.2.2 Translation

290 After scaling, Procrustes Analysis translates objects to a common origin. Objects are typically  
291 'centered' by subtracting the centroid of the landmark set (mean X, Y, and Z coordinate values  
292 per object) from each landmark coordinate, thus shifting the center of each landmark set to the  
293 origin ( $X=0$ ,  $Y=0$ ,  $Z=0$ ). Three points are considered for translation here: (1) the **beak** (Figure 1),  
294 (2) the **centroid of the shell** (Figure 2b), and (3) the **centroid of the commissure** (Figure 2a).  
295 Translation to the beak positions shells onto the homologous point of initial shell growth.  
296 Translation to the centroids of the shell or its commissure incorporate more information on the  
297 shape of the shell, with centering on the commissure adding an aspect of homology by  
298 positioning shells on their growth front. Operationally, Procrustes Analysis translates landmark  
299 sets to their respective centroids before minimizing their rotational distances, overriding any  
300 prescribed translations; the three translations above are therefore implemented after the rotation  
301 step (following the functionality in *Morpho::procSym* Schlager 2017).

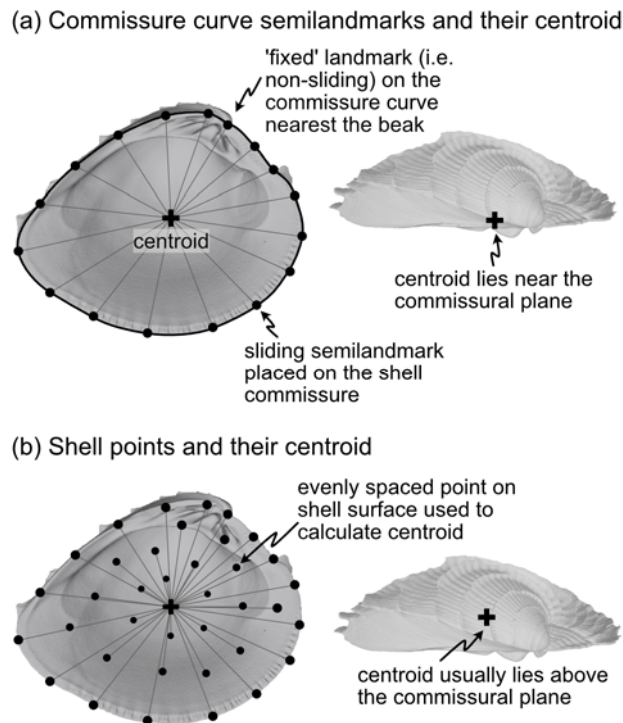

302

303 **Figure 2.** (a) Representation of shell commissure curve, its centroid, and the semilandmarks used  
304 in the COMM orientation scheme. Analyses use 50 sliding semilandmarks on the commissure

305 curve, but only a subset is shown here for clarity. (b) Equally spaced points on the shell surface  
306 placed using a Poisson Disc sampler (*Rvcg::vcgSample*, Schlager 2017) and their centroid. The  
307 number and location of vertices on triangular meshes can vary, which strongly influences the  
308 calculation of centroid size. Analyses use 2000 equally spaced points to minimize this issue  
309 (only a subset of those points shown here). Figured shell is *Chione elevata*.

### 310 **3.2.3 Rotation**

311 Rotation in Procrustes Analysis orients landmark coordinates to minimize their pairwise sum of  
312 squared distances. The 5 orientations discussed in the introduction were used for rotation.  
313 Because Procrustes Analysis uses Cartesian coordinates, two landmarks were placed on the mesh  
314 surface of a shell to indicate the direction of each axis as described in the subsections below  
315 (exact placement of landmarks on specimens in Figure S1).

#### 316 **Sagittal orientation**

317 *Sagittal axis [SX]*. This axis is the pole to the commissural plane (Figure 1). It is determined as  
318 the average cross product of successive vectors that originate at the centroid of the commissure  
319 and terminate at semilandmarks on the commissure curve (visualization of fitting the  
320 commissural plane in Figure S2). The distal direction is towards the exterior surface of the shell  
321 and the proximal direction is towards the interior surface.

#### 322 **Anteroposterior orientation**

323 *Hinge line [HL]*. The hinge line is determined by landmarks placed at the two farthest apart  
324 articulating elements of the hinge area (Figure 1). The landmarks are then designated as being  
325 anterior or posterior using the available discriminating features on the shell and can thus proxy  
326 the anteroposterior orientation. While not an 'axis' in the strict anatomical sense, we group the  
327 hinge line with the other anatomical axes below.

328 *Oro-anal axis [OAX]*. The positions of the mouth and anus or proxies thereof are used to orient  
329 the oro-anal axis and thus the anteroposterior orientation. For dimyarian taxa, anterior and  
330 posterior ends of the axis are determined by landmarks placed on the dorsal-most edge of the  
331 anterior and posterior adductor muscle scars (Figure 1a, the 'Type 2 adductor axis' of Bailey  
332 2009:493 after Stanley 1970:19). For monomyarian taxa that have retained the posterior adductor  
333 muscle, the centroid of that adductor muscle scar is landmarked as the posterior end of the axis  
334 and shell features that reflect the position of the mouth are landmarked as the anterior end (e.g.  
335 the ventral notch of the anterior auricle in pectinids [Figure 1b] or the beak in ostreids, Yonge  
336 1954). The axis is reversed in monomyarian taxa that have retained the anterior muscle (e.g. the  
337 protobranch Nucinellidae, Glover and Taylor 2013).

338 **Dorsoventral orientation**

339 *Maximum growth axis [GX]*. The origin of shell growth at the beak is the dorsal landmark on the  
340 maximum growth axis and the point on the shell commissure with the greatest linear distance to  
341 the beak is ventral landmark (Figure 1).

342 *Orthogonal hinge line [oHL]*. By definition, the orthogonal line to the HL (oHL) represents the  
343 dorsoventral axis, with the dorsal-most point nearest the beak.

344 *Orthogonal oro-anal axis [oAX]*. By definition, the orthogonal axis to the OAX (oOAX)  
345 represents the dorsoventral axis, with the dorsal-most point nearest the beak.

346 **Commissure orientation**

347 The manually placed landmarks on the shell commissure were used to fit a three-dimensional  
348 spline on which 50 equally spaced semilandmarks were placed in an anterior direction  
349 (clockwise for left valves when viewed towards the interior surface, counterclockwise for right  
350 valves). The semilandmark on the commissure curve nearest the beak landmark was selected as  
351 the initial point (Figure 2a). Semilandmarks were then slid to minimize bending energy and  
352 reduce artifactual differences in shape driven by their initial, equidistant placement (Gunz et al.  
353 2005; Gunz and Mitteroecker 2013; Schlager 2017).

354 **Standardized axis points**

355 We observed that variance among specimens in the distances between the axis landmarks  
356 notably influenced their best-fit orientation in the Procrustes Analysis (see difference in spacing  
357 of these landmarks in Figure S1). To remove this 'Pinocchio effect' (*sensu* Zelditch et al.  
358 2012:67), axis landmarks were 'standardized' (visualization of this process in Figure 3). The  
359 vector defined by the two axis landmarks was shifted to the centroid of the shell commissure and  
360 normalized to unit length; the standardized axis points (we explicitly avoid calling them  
361 landmarks) were then designated by the terminal points of the unit vector and its negative.  
362 Standardized axis points result in alignments that better reflect the collective impacts of axis  
363 direction, not magnitude.

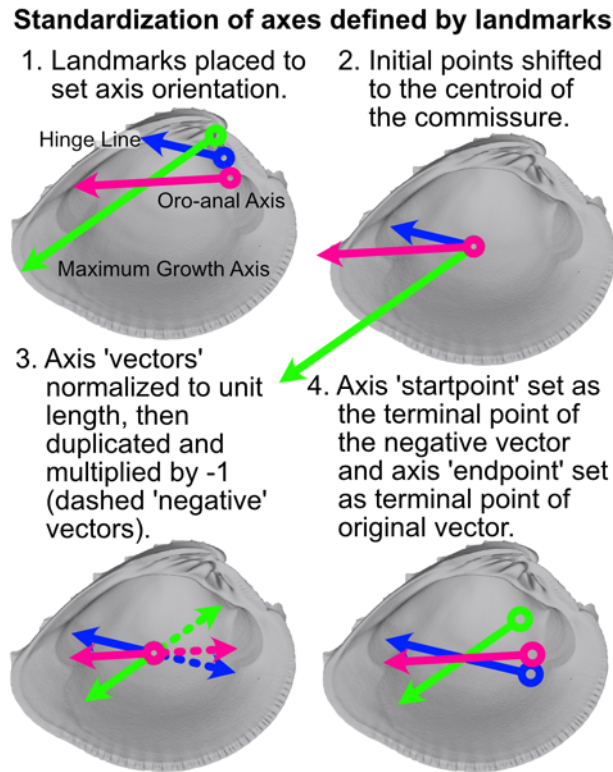

364

365 **Figure 3.** Visualization of procedure used to standardize the orientation axes defined by  
366 landmarks. Figured shell is *Chione elevata*.

### 367 **3.3 Alignment and comparison of shape differences**

368 Meshes and landmark sets for right valves were mirrored across their commissural plane and  
369 analyzed as operational left valves. This is a reasonable approach for equivalve taxa when  
370 analyzing general shell shape, e.g. of the interior or exterior surfaces, but homologous valves  
371 should be used for analyses that include inequivalve taxa as, by definition, their two shapes  
372 differ. Landmark sets were then scaled, rotated, and translated (in that order) under all possible  
373 parameter combinations outlined in the preceding section, totaling 45 alignment schemes.  
374 Landmark coordinate values were scaled by dividing the landmark coordinates by a specimen's  
375 size (e.g. centroid size or volume). Scaled landmarks were then temporarily centered on the  
376 centroid of the commissure and then rotated via the respective orientation scheme using  
377 Generalized Procrustes Analysis (*Morpho:procSym*, Schlager 2017); scaling during this step was  
378 explicitly disallowed. Lastly, scaled and rotated landmarks were translated to one of the three  
379 target locations (i.e. the beak or centroids of the commissure semilandmarks or shell points).

380 Similarity of alignments was quantified using the metric distances between the shapes of  
381 interior shell surfaces, which were used to reduce the impact of exterior ornamentation on the



382 differences in general shell shape. Sliding semilandmarks on the commissure and the interior  
383 surface of the shell were used to capture 'shape.' Initially, for the commissure, 50 equidistant  
384 semilandmarks were placed and the curve's starting point was determined by the orientation  
385 scheme (e.g. starting at the semilandmark nearest the beak for the SX-COMM orientation, see  
386 details in Supplemental Text §2.3, Figure S5); for the interior surface, semilandmarks were  
387 placed at proportionate distances along the dorsoventral and anteroposterior axes of each  
388 orientation scheme (5% distance used here, which results in 420 semilandmarks; see details and  
389 step-by-step visualization in Supplemental Text §2.3, Figure S3, Figure S4, Figure S5). Mixing  
390 the orientations of semilandmarks and rotation axes may be useful for comparing the interaction  
391 of growth and anatomical direction with shell shape, but this approach can result in unintuitive,  
392 and perhaps unintended, shape differences among specimens. After placement of equidistant  
393 semilandmarks, those on the commissure curve were slid to minimize their thin-plate spline  
394 bending energy and then used to bound the sliding of the surface semilandmarks (Figure S5;  
395 Gunz et al. 2005; Gunz and Mitteroecker 2013; implemented via *Morpho::slider3d*, Schlager  
396 2017). The final sliding semilandmark set consisted of 430 landmarks (50 points on the  
397 commissure plus the 380 points on the surface grid which do not lie on the commissure, i.e. the  
398 non-edge points; Figure S5). Landmark coverage analyses may be used at this point to maximize  
399 downstream statistical power (Watanabe 2018), but we relied on qualitative assessment of shape  
400 complexity and landmark coverage for the simple analyses conducted here.

401 For each of the 45 alignments, similarity in shell shape was calculated as the pairwise  
402 Euclidean distances of the sliding surface semilandmarks. Identical shapes have a distance of  
403 zero. Pairwise distances between shapes for each alignment scheme were normalized by their  
404 respective standard deviations, making the distances between specimens comparable across  
405 alignments. These normalized pairwise distances were then compared in three ways. First, a  
406 permutation-based multivariate analysis of variance (perMANOVA as implemented by  
407 *geomorph::procD.lm*, Adams et al. 2021) was used to model the effects of Procrustes Analysis  
408 steps on the scaled pairwise distances between specimens. Each of the 45 rows in the analyzed  
409 matrix was a unique Procrustes Analysis treatment, or alignment—i.e. a combination of scaling,  
410 rotation, and translation—and each of the 55 columns was a scaled distance between a pair of the  
411 eleven specimens. Second, this alignment matrix was scaled and centered and Principal  
412 Components Analysis was conducted to visualize the individual and joint effects treatments  
413 across alignments (i.e. Figure 4). Third, 'hive diagrams' (see network plots in Figure 5d) were  
414 used to compare the scaled pairwise distances of specimens among selected alignments to a  
415 reference alignment, where scaling = centroid of commissure, rotation = HL-oHL, translation =  
416 centroid of shell commissure.

#### 417 4. Results and Discussion

418 All three Procrustes Analysis steps—translation, scaling, and rotation—significantly affect the  
419 alignments of shells (Table1, visualized as clustering of steps in Figure 4). As defined in the  
420 Methods, quantitative similarity in alignment was determined using the scaled, pairwise  
421 Euclidean distances among the sliding semilandmarks placed on the interior surface of the shell.  
422 Treatments within steps (e.g. translation to the beak vs. centroid of the shell) differentiate  
423 alignments while the effects of other parameters are held constant ( $p=0.001$  for all parameters,  
424 Table1). Scaling most strongly differentiates alignments, with rotation and translation having  
425 smaller effects (see standardized effect sizes as  $Z$  scores in Table1). It follows that the  
426 differences between alignments are smallest among rotation and translation treatments (i.e. the  
427 smallest distances between alignments reflected as the lowest Sum of Squares, Table1, see also  
428 their clustering in Figure 4), and they increase for treatments of scaling. These metric differences  
429 among alignments are informative for understanding the impacts of individual steps in Procrustes  
430 Analysis, but visually comparing the orientations of shells is necessary to understand an  
431 alignment’s fidelity to biological homology and/or analogy.

432

433 **Table 1.** Permutation multivariate analysis of variance of the scaled pairwise distances between  
434 specimens across the 45 Procrustes Analysis alignments.

| <b>Term</b>      | <b><i>df</i></b> | <b>Sum of Squares</b> | <b>Mean Square</b> | <b><math>R^2</math></b> | <b><i>F</i></b> | <b><i>Z</i></b> | <b><i>p</i></b> |
|------------------|------------------|-----------------------|--------------------|-------------------------|-----------------|-----------------|-----------------|
| translation      | 2                | 30.6                  | 15.3               | 0.11                    | 13.7            | 4.4             | 0.001           |
| scaling          | 2                | 185.4                 | 92.7               | 0.64                    | 82.7            | 6.2             | 0.001           |
| rotation         | 4                | 34.7                  | 8.7                | 0.12                    | 7.7             | 4.8             | 0.001           |
| <b>Residuals</b> | 36               | 40.3                  | 1.1                | 0.14                    |                 |                 |                 |
| <b>Total</b>     | 44               | 291.0                 |                    |                         |                 |                 |                 |

435

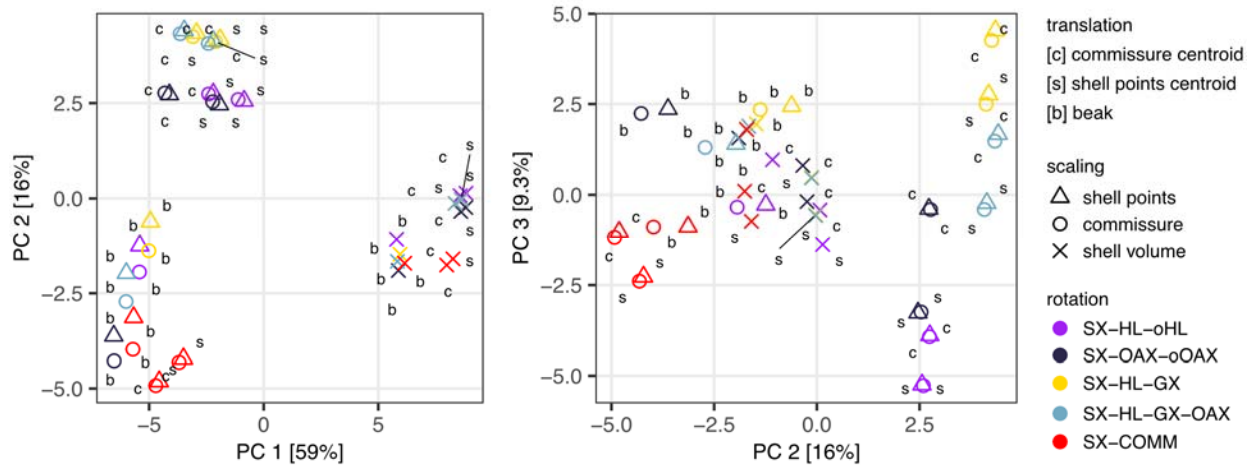

436

437 **Figure 4.** Principal Components Analysis of forty-five alignments (represented by points).  
 438 Spacing of alignments along the first three axes that describe 84.3% of the total variance reflects  
 439 the results of the MANOVA in Table1. Scaling by shell volume vs. the centroid size of either the  
 440 shell points or the commissure separate along PC1; together, PCs 2 and 3 show the clustering of  
 441 alignments with SX-COMM rotation, translation to the beak, the similarity of translation to the  
 442 centroids of the commissure semilandmarks and shell points, and separation of the axis-based  
 443 rotation schemes.

#### 444 4.1 Effects of translation

445 The choice of translation can change how differences in shell shape are interpreted. Translation  
 446 to the beak, the lone homologous point across the class, allows the comparison of shell shapes  
 447 conditioned on directions of growth from their origins (Figure 5c). *Ensis* can be described as  
 448 being posteriorly elongated compared to *Glycymeris*, or *Pecten* as 'taller' than *Pholas* from the  
 449 beak to the ventral margin. Still, translation to the beak can exaggerate or bias the differences in  
 450 'pure' shell shape. For example, *Ensis* and *Tagelus* have greater distances between their shapes  
 451 when translated to the beak than to the centroid of commissure semilandmarks (red line in  
 452 Figure 5d.iii). Their offset positions of the beak underlies this difference, which is interesting for  
 453 analyses of growth vs. shape, but the shape of the shell, irrespective of its growth, is arguably the  
 454 primary target of ecological selection (Stanley 1970, 1975, 1988; Vermeij 2002; Seilacher and  
 455 Gishlick 2014). Thus, measuring the morphological similarity of shells for studies of  
 456 ecomorphology, trends in disparity, or evolutionary convergence would be best conducted using  
 457 translation to their respective centroids of the commissure or shell surface (Figure 5a,b); these  
 458 two translations yield very similar alignments given the close proximity of their respective  
 459 centroids (as shown by the pale colors linking specimens in Figure 5d.ii; but note the small offset  
 460 between the two centroids for the more irregularly shaped *Cuspidaria*). In general, it is best

461 practice to translate shells to their respective centroids of the commissure semilandmarks or shell  
 462 points when morphological analyses target differences in pure shell shape. Translation to the  
 463 centroid of the commissure is preferred because it incorporates homology into the alignment via  
 464 correspondence of the leading edge of shell growth.

465

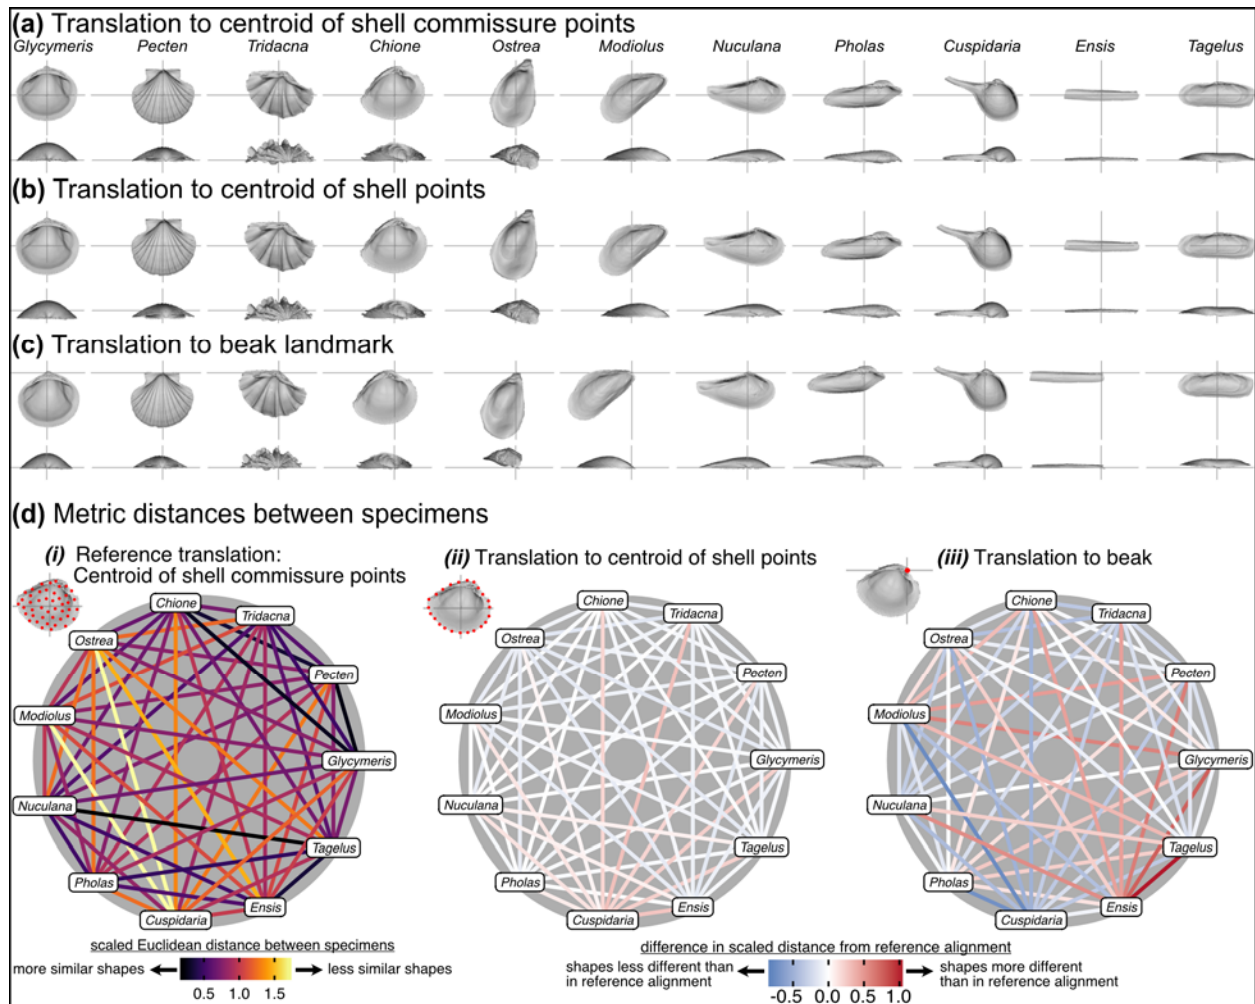

466

467 **Figure 5.** Effects of translation on differences in shell shapes. All shells are scaled to the  
 468 centroid size of the shell points and rotated using the SX-HL-oHL scheme. For individual images  
 469 of shells, the intersection of the gray line segments marks the origin of the Cartesian coordinate  
 470 system and thus the operational 'center' of the shell. (a) Translation to the centroid of the 2000  
 471 equidistant points placed on the mesh surface of the shell. (b) Translation of shells to the  
 472 centroid of the 50 semilandmark curve along the shell commissure. (c) Translation of shells to  
 473 the apex of the beak landmark, the initial point of shell growth. (d) (i) The scaled pairwise  
 474 Euclidean distances of semilandmarks placed on the interior surface of the shell, scaled to the

475 centroid size of the shell points and translated to the centroid of the shell commissure. 'Hotter'  
476 colors indicate greater relative distances between specimens. **(ii-iii)** The difference in scaled  
477 distance of specimens for the specified translation from the reference treatment in panel *i*. More  
478 saturated reds indicate an increase in scaled distance relative to the reference alignment;  
479 conversely, more saturated blues indicate a decrease in distance; white indicates no difference.  
480 For example, *Ensis* and *Tagelus* become more dissimilar in interior shell shape when translated  
481 to their respective beaks than when each are translated to their centroid of the commissure.

## 482 **4.2 Effects of scaling**

483 Scaling has a large effect on the differences between alignments (see largest Sum of Squares for  
484 the term in the ANOVA, Table1). Scaling by volume leaves particularly large residual  
485 differences in shape; the most voluminous shells are made extremely minute (*Pecten* and  
486 *Tridacna* in particular, Figure 6c) while the least voluminous shells become the largest  
487 (*Nuculana* and *Cuspidaria*). Scaling to logged shell volume does not alleviate these residual  
488 differences (results not shown), and, moreover, the aim of this scaling step is to remove the  
489 isometric relationship of size to shape, not its allometric one. The relative sizes of specimens are  
490 more similar when scaled to the centroid size of the commissure semilandmarks or the shell  
491 points (Figure 6a,b). These two sizes are tightly correlated (Figure S6) and thus produce very  
492 similar alignments (Figure 6d.ii). For comparing differences in overall shell morphology in 3D,  
493 scaling by the centroid size of shell points would best equalize the isometric differences in size  
494 among specimens, thus concentrating the remaining differences in morphology to their shapes.

495



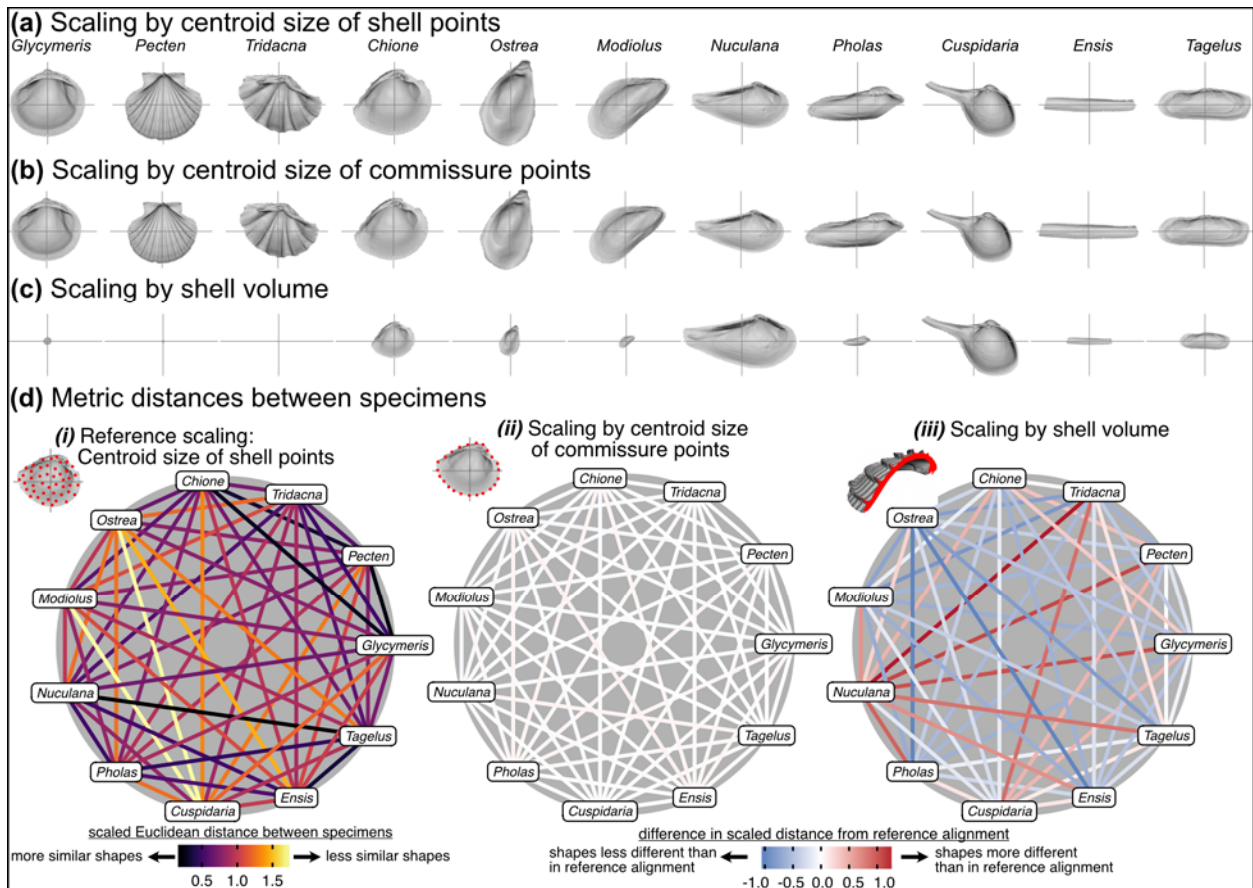

496

497 **Figure 6.** Effects of scaling on differences in shell shapes. All shells are translated centroid of  
 498 the commissure semilandmarks and rotated using the SX-HL-oHL scheme. Compare differences  
 499 in scaled sizes of specimens across rows, not columns. **(a)** Shells scaled by the centroid size of  
 500 the 2000 equidistant points placed on the surface of the shell mesh. **(b)** Shells scaled to the  
 501 centroid size of the 50 semilandmark curve along the shell commissure. **(c)** Shells scaled by the  
 502 volume of shell carbonate. **(d)** As in Figure 5d but based on differences in scaling.

### 503 4.3 Effects of rotation

504 Of the three Procrustes Analysis parameters, rotation is arguably the most important factor  
 505 defining the biological basis for differences in shell shape. Visually, rotation treatments can  
 506 produce nearly orthogonal orientations of specimens (compare the nearly orthogonal orientation  
 507 of the traditional shell length axis for *Ensis* and *Tagelus* between SX-HL-oHL and SX-COMM,  
 508 Figure 7a,e; also reflected in the deep-red bar linking these two taxa in Figure 7f.v and is spacing  
 509 of specimens on the first two PC axes in Figure S7). Equilateral shells are aligned similarly  
 510 across rotation treatments (compare orientations of *Glycymeris*, *Pecten*, and *Tridacna*, cf. *Ostrea*,  
 511 in Figure 7a-e and the less saturated lines connecting them in Figure 7e.ii-v). Differences in

512 alignments become more pronounced among the more inequilateral shells (seen to a minor extent  
513 in *Chione* relative to *Glycymeris* and *Pecten*, but notably in *Modiolus*, *Pholas*, *Cuspidaria*, and  
514 *Ensis*). Thus, alignments of inequilateral shells tend to reflect a compromise between the often  
515 subparallel but not orthogonal orientations of their axes (most clearly seen in the changes to the  
516 orientation of *Modiolus*, *Pholas*, and *Ensis* relative to *Glycymeris* and *Pecten* in Figure 7a-f).  
517 Rotation by sliding semilandmarks on the commissure results in a similar alignment of most  
518 shells to the hinge line orientation (pale lines in Figure 7e.v), but the relative shape differences of  
519 *Modiolus*, *Ensis*, and *Tagelus* indicate the importance and impact of the beak position. The  
520 commissure curve begins at the point nearest the beak, which affects the orientation of the  
521 surface semilandmark grid (see Figure S5). Thus, in the SX-COMM treatment, the growth and  
522 therefore 'shape' of *Modiolus* and *Ensis* is more similar to the tall-shelled *Ostrea* than either are  
523 to the putative, similarly elongate *Pholas* and *Tagelus* (which themselves become more  
524 dissimilar in shape owing to the slight offset in their beak positions). Overall, rotation using the  
525 hinge axis and its orthogonal axis as the pseudo dorsoventral axis is likely the best practice for  
526 most analyses of shell shape, as discussed below.

527

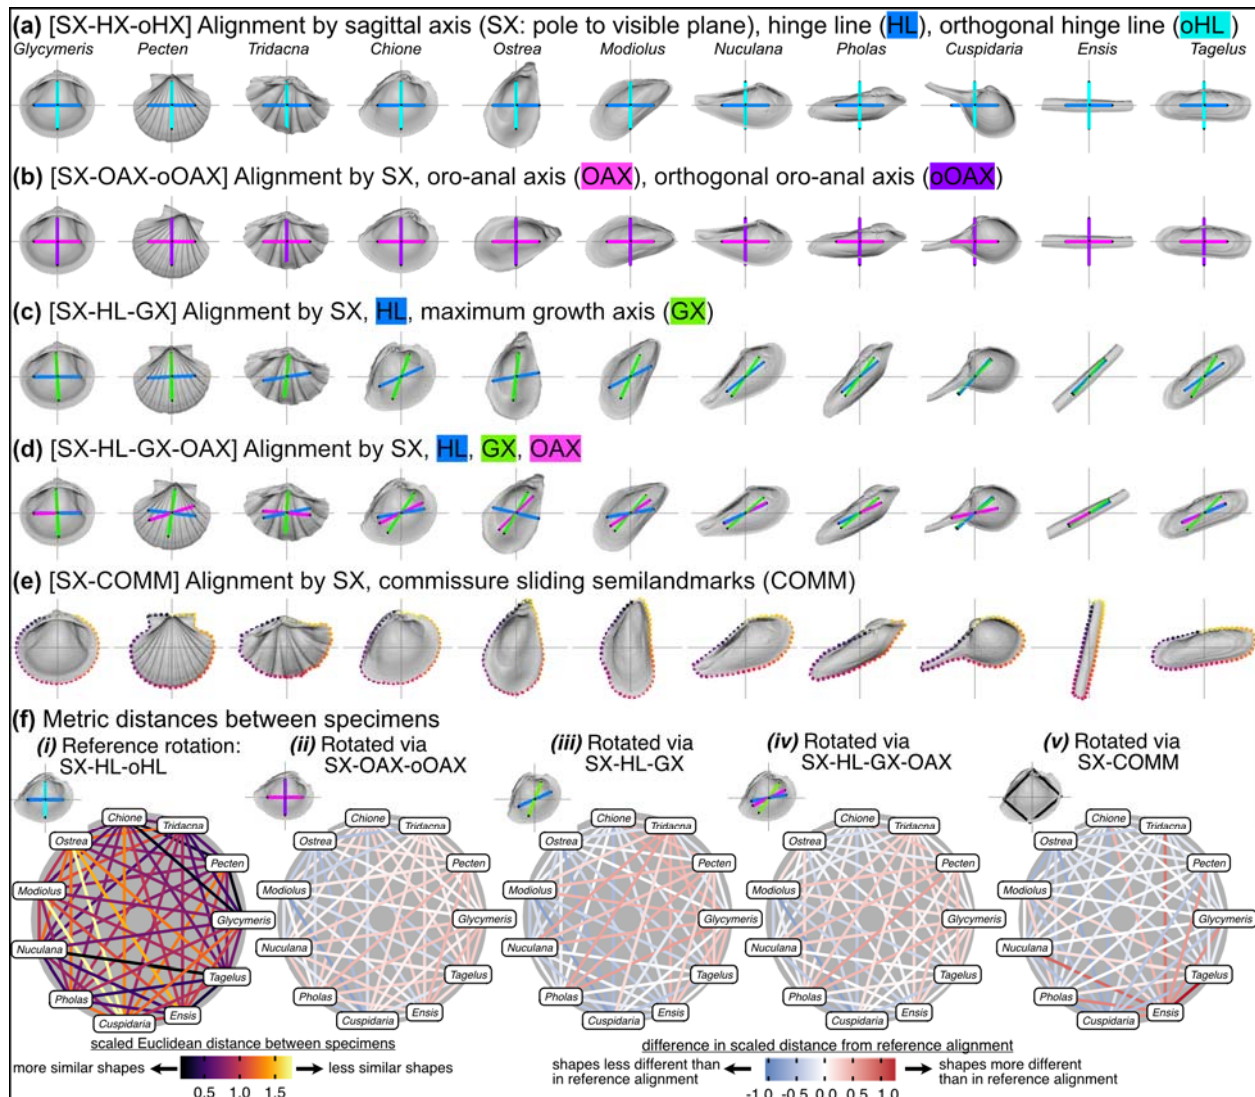

528

529 **Figure 7.** Effects of rotation on differences in shell shapes. All shells are translated centroid of  
 530 the commissure semilandmarks and scaled to the centroid size of the shell points. Highlighted  
 531 colors of panel titles correspond to axes plotted on shells. To facilitate relative comparisons of  
 532 shell shape across columns, shells in each row were rotated such that the 'x' axis is parallel to the  
 533 hinge line of *Glycymeris*; this is an ad-hoc, global rotation that does not change between-  
 534 specimen differences in shell shape. **(a)** Shells rotated by their sagittal axis, hinge line, and  
 535 orthogonal hinge line as the pseudo dorsoventral axis. **(b)** Shells rotated by their sagittal axis,  
 536 oro-anal axis, and orthogonal oro-anal axis as the pseudo dorsoventral axis. **(c)** Shells rotated by  
 537 their sagittal, hinge, and maximum growth axes. **(d)** Shells rotated by their sagittal, hinge,  
 538 maximum growth, and oro-anal axes **(e)** Shells rotated by their sagittal axis and commissure

539 semilandmarks. (f) As in Figure 5d but based on differences in rotation. See Figure S7 for a  
540 projection of shell shape differences along the first two principal components.

#### 541 **4.4 Practical alignments for bivalve shells**

542 The axis-based approach to alignment (Figure 7a-d) is useful both for its ability to  
543 encompass broad phylogenetic analyses of shell morphology and for its ability to combine extant  
544 and fossil data, the latter known almost exclusively from shells. All shell morphologies should fit  
545 within this scheme, including those with strong lateral asymmetry (e.g. rudists, see Jablonski  
546 2020, and those with calcified tubes or crypts (teredinids and clavagellids, Morton 1985; Savazzi  
547 1999, each of which have identifiable valves with anatomical axes—whether to include the tubes  
548 and crypts as aspects of shell morphology is a different debate). With increasing phylogenetic  
549 proximity, the number of point-based biological homologies is likely to increase, permitting  
550 more traditional approaches to specimen alignment (Roopnarine 1995; Roopnarine et al. 2008;  
551 Márquez et al. 2010; Serb et al. 2011; Collins et al. 2013, 2020; Edie et al. 2022; Milla Carmona  
552 et al. First View). These shell-based axes and features (Figure 7a-e) are also useful for  
553 incorporating fossil taxa into analyses with extant taxa (Yonge 1954; Cox et al. 1969; Stanley  
554 1970; Bailey 2009), but aspects of the internal anatomy remain crucial for orientation (Stasek  
555 1963a), especially the designation of the anterior and posterior ends. Fortunately, in many cases  
556 the anteroposterior axis can be determined from imprints of the soft anatomy on the shell surface  
557 (e.g. the pallial sinus) or from other shell features (e.g. siphonal canals, pedal gapes). This  
558 necessarily variable and often idiosyncratic approach to defining the direction of anatomical axes  
559 may result in more digitization error than seen in traditional point-based geometric  
560 morphometrics. However, the impact of that error on analytical interpretations of shape  
561 similarity and variance will depend on the overall scale of shape disparity; for analyses of  
562 morphology across the class, the latter is likely to far exceed the former.

563 In biological systems with limited homology in a strict, point-based, geometric sense—  
564 and even in those with plenty of it—numerous approaches have been used to align specimens for  
565 morphological analysis. A single solution likely does not exist, and comparisons among different  
566 methods will be the most powerful approach to testing evolutionary hypotheses (see Bromham  
567 2016 for the necessity of comparative analyses in historical science). As for most analytical  
568 frameworks, comparisons of shell shape will require explicit definition of the alignment scheme  
569 and interpretation of any differences within those boundaries. Thus, we cannot declare outright  
570 that one of these alignment schemes is logically superior, but we do recognize a practical  
571 solution that, to us, best reflects the decades of study of shell morphology: alignment via the  
572 sagittal axis, hinge line, and its orthogonal line as the pseudo dorsoventral axis (SX-HL-oHL).  
573 Shell height, length, and width have been the principal measurements for analyzing differences



574 in shape, and long-standing, taxon-specific 'rules' have become entrenched in the literature and  
575 therefore influence our interpretations of the clade's evolutionary morphology (see discussion in  
576 Cox et al. 1969:81–82 and the continued utility of these measurements in Kosnik et al. 2006).  
577 The SX-HL-oHL rotation tends to orient shells according to the defined axes of those linear  
578 measurements. Of course, precedent need not dictate the course of future work, but here, we find  
579 it reasonable to align this 'next generation' of shell shape analyses with the long-standing  
580 conventions in the literature, if only for comparative purposes.

## 581 **5. Conclusions**

582 The debate on how to align specimens is still relevant in the current era of morphometry, where  
583 comparisons of animal form are increasingly accessible in 2D, 3D, and even 4D (Boyer et al.  
584 2016; Olsen et al. 2017; Pearson et al. 2020). But, no matter how shapes are compared,  
585 interpretations of their differences or variances should be with respect to an assumed anatomical  
586 alignment. For comparisons of disparate morphologies, particularly those that lack biological  
587 homology conducive to point-based landmarking, alignments will likely require non-standard  
588 approaches so that shape differences do not depend on geometric correspondence alone. In  
589 bivalves, anatomical axes inferred from taxon-specific features offer a class-wide approach to  
590 orientation. One set of axes in particular (HL-SX-DVX) coincides with historical approaches to  
591 their morphometry, while another offers new insight into the relationship between shell shape  
592 and shell growth (COMM-SX). Either of these solutions are valid in their own way. This  
593 philosophy of specimen alignment may be particularly relevant to other model systems in  
594 paleobiology and macroevolution that have accretionary-style growth: gastropods, brachiopods,  
595 corals, bryozoans, etc.—each with limited point-based landmarks corresponding to biological  
596 homology.

## 597 **6. Acknowledgments**

598 We thank FMNH and NMNH and their staff for access to the specimens used in this study.

## 599 **7. Funding**

600 Supported by National Aeronautics and Space Administration (NNX16AJ34G), the National  
601 Science Foundation (EAR-0922156, EAR-2049627), and the University of Chicago Center for  
602 Data and Computing.

## 603 **8. Data Availability**

604 Mesh models, landmark data, and code for reproducing analyses and figures available from  
605 Zenodo: [10.5281/zenodo.6326531](https://doi.org/10.5281/zenodo.6326531).



606 **9. Authors' contributions**

607 SME and KSC designed the study, SME performed analyses, all authors contributed to the  
608 writing.

609 **10. References**

- 610 Adams, D. C., M. L. Collyer, A. Kaliontzopoulou, and E. K. Baken. 2021: Geomorph: Software  
611 for geometric morphometric analyses. R package version 4.0. [https://cran.r-](https://cran.r-project.org/web/packages/geomorph/index.html)  
612 [project.org/web/packages/geomorph/index.html](https://cran.r-project.org/web/packages/geomorph/index.html)
- 613 Allen, J. A., and H. L. Sanders. 1969: *Nucinella serrei* Lamy (Bivalvia: Protobranchia), A  
614 monomyarian solemyid and possible living actinodont. *Malacologia* 7:381–396.
- 615 Bailey, J. B. 2009: Shell orientation terminology among the Bivalvia (Mollusca): Problems and  
616 proposed solutions. *Journal of Paleontology* 83:493–495.
- 617 Bardua, C., R. N. Felice, A. Watanabe, A.-C. Fabre, and A. Goswami. 2019: A practical guide to  
618 sliding and surface semilandmarks in morphometric analyses. *Integrative Organismal*  
619 *Biology* 1:obz016.
- 620 Bookstein, F. L. 1991: Landmarks. Pp. 55–87 in *Morphometric Tools for Landmark Data:*  
621 *Geometry and Biology*. Cambridge University Press, Cambridge.
- 622 Borrás, A., J. Pascual, and J. C. Senar. 2000: What do different bill measures measure and what  
623 is the best method to use in granivorous birds? *Journal of Field Ornithology* 71:606–611.
- 624 Boyer, D. M., G. F. Gunnell, S. Kaufman, and T. M. McGeary. 2016: Morphosource: Archiving  
625 and sharing 3-D digital specimen data. *The Paleontological Society Papers* 22:157–181.
- 626 Bradshaw, J. D., and M. A. Bradshaw. 1971: Functional morphology of some fossil  
627 palaeotaxodont bivalve hinges as a guide to orientation. *Palaeontology* 14:242–249.
- 628 Bromham, L. 2016: Testing hypotheses in macroevolution. *Studies in History and Philosophy of*  
629 *Science Part A* 55:47–59.
- 630 Carter, J. G., P. J. Harries, N. Malchus, A. F. Sartori, L. C. Anderson, R. Bieler, A. E. Bogan, E.  
631 V. Coan, J. C. W. Cope, S. M. Cragg, J. R. García-March, J. Hylleberg, P. Kelley, K.  
632 Kleemann, C. McRoberts, P. M. Mikkelsen, J. Pojeta, W. Skelton, I. Tëmkin, T. Yancey,  
633 and A. Zieritz. 2012: Illustrated glossary of the Bivalvia. *Treatise Online* No. 48, Part N,  
634 Revised, Volume 1, Chapter 31:1–209.
- 635 Carter, R. M. 1967: On the nature and definition of the lunule, escutcheon and corcelet in the  
636 Bivalvia. *Journal of Molluscan Studies* 37:243–263.
- 637 Collins, K. S., J. S. Crampton, and M. Hannah. 2013: Identification and independence:  
638 Morphometrics of Cenozoic New Zealand *Spissatella* and *Eucrassatella* (Bivalvia,  
639 Crassatellidae). *Paleobiology* 39:525–537.

- 640 Collins, K. S., S. M. Edie, and D. Jablonski. 2020: Hinge and ecomorphology of *Legumen*  
641 Conrad, 1858 (Bivalvia, Veneridae), and the contraction of venerid morphospace  
642 following the end-Cretaceous extinction. *Journal of Paleontology* 94:489–497.
- 643 Cox, L. R., C. P. Nuttall, and E. R. Trueman. 1969: General features of Bivalvia. Pp. 2–129 in R.  
644 C. Moore, ed. *Treatise of Invertebrate Paleontology. Part N, Mollusca 6, Bivalvia. Vol. 1.*  
645 Geological Society of America & University of Kansas, Boulder, CO & Lawrence, KS.
- 646 Crame, J. A. 2020: Early Cenozoic evolution of the latitudinal diversity gradient. *Earth-Science*  
647 *Reviews* 202:103090.
- 648 Edie, S. M., D. Jablonski, and J. W. Valentine. 2018: Contrasting responses of functional  
649 diversity to major losses in taxonomic diversity. *Proceedings of the National Academy of*  
650 *Sciences U.S.A.* 115:732–737.
- 651 Edie, S. M., S. C. Khouja, K. S. Collins, N. M. A. Crouch, and D. Jablonski. 2022: Evolutionary  
652 modularity, integration and disparity in an accretionary skeleton: Analysis of venerid  
653 Bivalvia. *Proceedings of the Royal Society B: Biological Sciences* 289:20211199.
- 654 Fang, Z., and T. M. Sanchez. 2012: Origin and early evolution of the Bivalvia. *Treatise Online*  
655 no. 43: Part N, Revised, Volume 1, Chapter 16:1–21.
- 656 Glover, E. A., and J. D. Taylor. 2013: A new shallow water species of *Nucinella* from the  
657 Philippines (Bivalvia: Protobranchia: Nucinellidae), member of a tropical seagrass  
658 chemosynthetic community. *The Nautilus* 127:101–106.
- 659 Gunz, P., and P. Mitteroecker. 2013: Semilandmarks: A method for quantifying curves and  
660 surfaces. *Hystrix, the Italian Journal of Mammalogy* 24:103–109.
- 661 Gunz, P., P. Mitteroecker, and F. L. Bookstein. 2005: Semilandmarks in three dimensions. Pp.  
662 73–98 in D. E. Slice, ed. *Modern Morphometrics in Physical Anthropology.* Kluwer  
663 Academic Publishers-Plenum Publishers, New York.
- 664 Jablonski, D. 2020: Developmental bias, macroevolution, and the fossil record. *Evolution &*  
665 *Development* 22:103–125.
- 666 Jablonski, D., S. Huang, K. Roy, and J. W. Valentine. 2017: Shaping the latitudinal diversity  
667 gradient: New perspectives from a synthesis of paleobiology and biogeography.  
668 *American Naturalist* 189:1–12.
- 669 Jackson, R. T. 1890: Phylogeny of the Pelecypoda: The Aviculidae and their allies. *Memoirs of*  
670 *the Boston Society of Natural History* 4:277–400.
- 671 Kosnik, M. A., D. Jablonski, R. Lockwood, and P. M. Novack-Gottshall. 2006: Quantifying  
672 molluscan body size in evolutionary and ecological analyses: Maximizing the return on  
673 data-collection efforts. *PALAIOS* 21:588–597.
- 674 Lison, L. 1949: Recherches sur la forme et la mécanique de développement des coquilles des  
675 Lamellibranches. *Mémoires Institut royal des Sciences Naturelles de Belgique* 34:3–87.

- 676 Marin, F., N. Le Roy, and B. Marie. 2012: The formation and mineralization of mollusk shell.  
677 *Frontiers in Bioscience (Schol. Ed.)* S4:1099–1125.
- 678 Márquez, F., R. Amoroso, M. Gowland Sainz, and S. Van der Molen. 2010: Shell morphology  
679 changes in the scallop *Aequipecten tehuelchus* during its life span: A geometric  
680 morphometric approach. *Aquatic Biology* 11:149–155.
- 681 Mikkelsen, P. M., R. Bieler, I. Kappner, and T. A. Rawlings. 2006: Phylogeny of Veneroidea  
682 (Mollusca: Bivalvia) based on morphology and molecules. *Zoological Journal of the*  
683 *Linnean Society* 148:439–521.
- 684 Milla Carmona, P. S., D. G. Lazo, and I. M. Soto. First View: Ontogeny in the steinmanellines  
685 (Bivalvia: Trioniida): An intra- and interspecific appraisal using the Early Cretaceous  
686 faunas from the Neuquén Basin as a case study. *Paleobiology*.
- 687 Morton, B. 1985: Adaptive radiation in the Anomalodesmata. Pp. 405–459 *in* *The Mollusca*,  
688 Vol. 10, Evolution. Elsevier.
- 689 Morton, J. E., and C. M. Yonge. 1964: Classification and structure of the Mollusca. Pp. 1–58 *in*  
690 K. M. Wilbur and C. M. Yonge, eds. *Physiology of Mollusca*. Vol. 1. Elsevier, New  
691 York.
- 692 Olsen, A. M., A. L. Camp, and E. L. Brainerd. 2017: The opercular mouth-opening mechanism  
693 of largemouth bass functions as a 3D four-bar linkage with three degrees of freedom.  
694 *Journal of Experimental Biology* 220:4612–4623.
- 695 Owen, G. 1952: Shell-form in the Lamellibranchia. *Nature* 170:148–149.
- 696 Pearson, K. D., G. Nelson, M. F. J. Aronson, P. Bonnet, L. Brenskelle, C. C. Davis, E. G. Denny,  
697 E. R. Ellwood, H. Goëau, J. M. Heberling, A. Joly, T. Lorieul, S. J. Mazer, E. K.  
698 Meineke, B. J. Stucky, P. Sweeney, A. E. White, and P. S. Soltis. 2020: Machine learning  
699 using digitized herbarium specimens to advance phenological research. *BioScience*  
700 70:610–620.
- 701 Polly, P. D., and N. MacLeod. 2008: Locomotion in fossil carnivora: An application of  
702 eigensurface analysis for morphometric comparison of 3D surfaces. *Palaeontologia*  
703 *Electronica* 11:1–13.
- 704 Roopnarine, P. D. 1995: A re-evaluation of evolutionary stasis between the bivalve species  
705 *Chione erosa* and *Chione cancellata* (Bivalvia: Veneridae). *Journal of Paleontology*  
706 69:280–287.
- 707 Roopnarine, P. D., J. Signorelli, and C. Laumer. 2008: Systematic, biogeographic, and  
708 microhabitat-based morphometric variation of the bivalve *Anomalocardia squamosa*  
709 (Bivalvia: Veneridae: Chioninae) in Thailand. *The Raffles Bulletin of Zoology* 18:90–98.
- 710 Savazzi, E. 1987: Geometric and functional constraints on bivalve shell morphology. *Lethaia*  
711 20:293–306.

- 712 Savazzi, E. 1999: Borng, nestling and tube-dwelling bivalves. Pp. 205–237 *in* Functional  
713 Morphology of the Invertebrate Skeleton. John Wiley & Sons, Chichester.
- 714 Scarlato, O. A., and Y. I. Starobogatov. 1978: Phylogenetic relations and the early evolution of  
715 the Class Bivalvia. *Philosophical Transactions of the Royal Society B: Biological*  
716 *Sciences* 284:217–224.
- 717 Schlager, S. 2017: Morpho and Rvcg – Shape analysis in R: R-Packages for geometric  
718 morphometrics, shape analysis and surface manipulations. Pp. 217–256 *in* G. Zheng, S.  
719 Li, and G. Székely, eds. *Statistical Shape and Deformation Analysis: Methods,*  
720 *Implementation and Applications*. Academic Press, London, UK.
- 721 Seilacher, A., and A. D. Gishlick. 2014: *Morphodynamics*. CRC Press, Boca Raton, FL.
- 722 Serb, J. M., A. Alejandrino, E. Otárola-Castillo, and D. C. Adams. 2011: Morphological  
723 convergence of shell shape in distantly related scallop species (Mollusca: Pectinidae).  
724 *Zoological Journal of the Linnean Society* 163:571–584.
- 725 Stanley, S. M. 1970: Relation of shell form to life habits of the Bivalvia (Mollusca). *Geological*  
726 *Society of America Memoirs* 125:1–282.
- 727 ———. 1975: Why clams have the shape they have: An experimental analysis of burrowing.  
728 *Paleobiology* 1:48–58.
- 729 ———. 1988: Adaptive morphology of the shell in bivalves and gastropods. Pp. 105–141 *in* E.  
730 R. Trueman and M. R. Clarke, eds. *The Mollusca Vol. 11, Form and Function*. Academic  
731 Press, San Diego.
- 732 Stasek, C. R. 1963a: Orientation and form in the bivalved Mollusca. *Journal of Morphology*  
733 112:195–214.
- 734 Stasek, C. R. 1963b: Geometrical form and gnomonic growth in the bivalved Mollusca. *Journal*  
735 *of Morphology* 112:215–231.
- 736 Taylor, J. D., and E. Glover. 2021: *Biology, Evolution and Generic Review of the*  
737 *Chemosymbiotic Bivalve Family Lucinidae*. Series 182, The Ray Society, London, UK.
- 738 Trueman, E. R. 1964: Adaptive morphology in palaeoecological interpretation. Pp. 45–74 *in* J.  
739 Imbrie and N. D. Newell, eds. *Approaches to Paleontology*. Wiley, New York.
- 740 Ubukata, T. 2003: Pattern of growth rate around aperture and shell form in Bivalvia: A  
741 theoretical morphological study. *Paleobiology* 29:480–491.
- 742 Vermeij, G. J. 2002: Characters in context: Molluscan shells and the forces that mold them.  
743 *Paleobiology* 28:41–54.
- 744 Vermeij, G. J. 2013: Molluscan marginalia: Hidden morphological diversity at the bivalve shell  
745 edge. *Journal of Molluscan Studies* 79:283–295.
- 746 Visual Computing Lab ISTI – CNR. 2019: Meshlab. <https://www.meshlab.net>
- 747 Waller, T. R. 1998: Origin of the molluscan class Bivalvia and a phylogeny of major groups. Pp.

- 748 1–45 in P. Johnston and J. Haggart, eds. *Bivalves: An Eon of Evolution*. Vol. 1.  
749 University of Calgary Press, Calgary.
- 750 Watanabe, A. 2018: How many landmarks are enough to characterize shape and size variation?  
751 PLOS ONE 13:e0198341.
- 752 Yonge, C. M. 1954: The monomyarian condition in the Lamellibranchia. *Transactions of the*  
753 *Royal Society of Edinburgh* 62:443–478.
- 754 Yonge, C. M. 1955: Adaptation to rock boring in *Botula* and *Lithophaga* (Lamellibranchia,  
755 Mytilidae) with a discussion on the evolution of this habit. *Quarterly Journal of*  
756 *Microscopical Science* 96:383–410.
- 757 Zelditch, M. L., D. L. Swiderski, and H. D. Sheets. 2012: *Geometric Morphometrics for*  
758 *Biologists: A Primer*. 2<sup>nd</sup> ed. Academic Press, San Diego, CA.  
759



760 **Supplemental Material**

761 **S1. Supplemental Data**

762 Table S1. Taxa used in this study and source of material.

| family         | genus             | species           | authority                          | valve | museum | catalog no. | biv3d.meshid |
|----------------|-------------------|-------------------|------------------------------------|-------|--------|-------------|--------------|
| Cardiidae      | <i>Tridacna</i>   | <i>squamosa</i>   | (Lamarck 1819)                     | L     | FMNHIZ | 166020      | 317          |
| Cuspidariidae  | <i>Cuspidaria</i> | <i>rostrata</i>   | (Spengler 1793)                    | L     | USNM   | 811161      | 1272         |
| Glycymerididae | <i>Glycymeris</i> | <i>glycymeris</i> | (Linnaeus 1758)                    | L     | USNM   | 199801      | 1683         |
| Mytilidae      | <i>Modiolus</i>   | <i>modiolus</i>   | (Linnaeus 1758)                    | R     | FMNHIZ | 126621      | 570          |
| Nuculanidae    | <i>Nucula</i>     | <i>pernula</i>    | (Mueller 1779)                     | L     | BMNH   | 20180321    | 3255         |
| Ostreidae      | <i>Ostrea</i>     | <i>capsa</i>      | J. G. F. Fischer von Waldheim 1807 | R     | FMNHIZ | 279417      | 138          |
| Pectinidae     | <i>Pecten</i>     | <i>maximus</i>    | (Linnaeus 1767)                    | R     | USNM   | 25529       | 1566         |
| Pholadidae     | <i>Pholas</i>     | <i>dactylus</i>   | Linnaeus 1758                      | L     | USNM   | 337277      | 2380         |
| Solecurtidae   | <i>Tagelus</i>    | <i>plebeius</i>   | (Lightfoot 1786)                   | L     | FMNHIZ | 177579      | 769          |
| Solenidae      | <i>Ensis</i>      | <i>siliqua</i>    | (Linnaeus 1758)                    | L     | USNM   | 27141       | 3144         |
| Veneridae      | <i>Chione</i>     | <i>elevata</i>    | (Say 1822)                         | L     | FMNHIZ | 176349      | 180          |

763 **S2. Supplemental Methods**

764 **S2.1. Placement of axis landmarks**

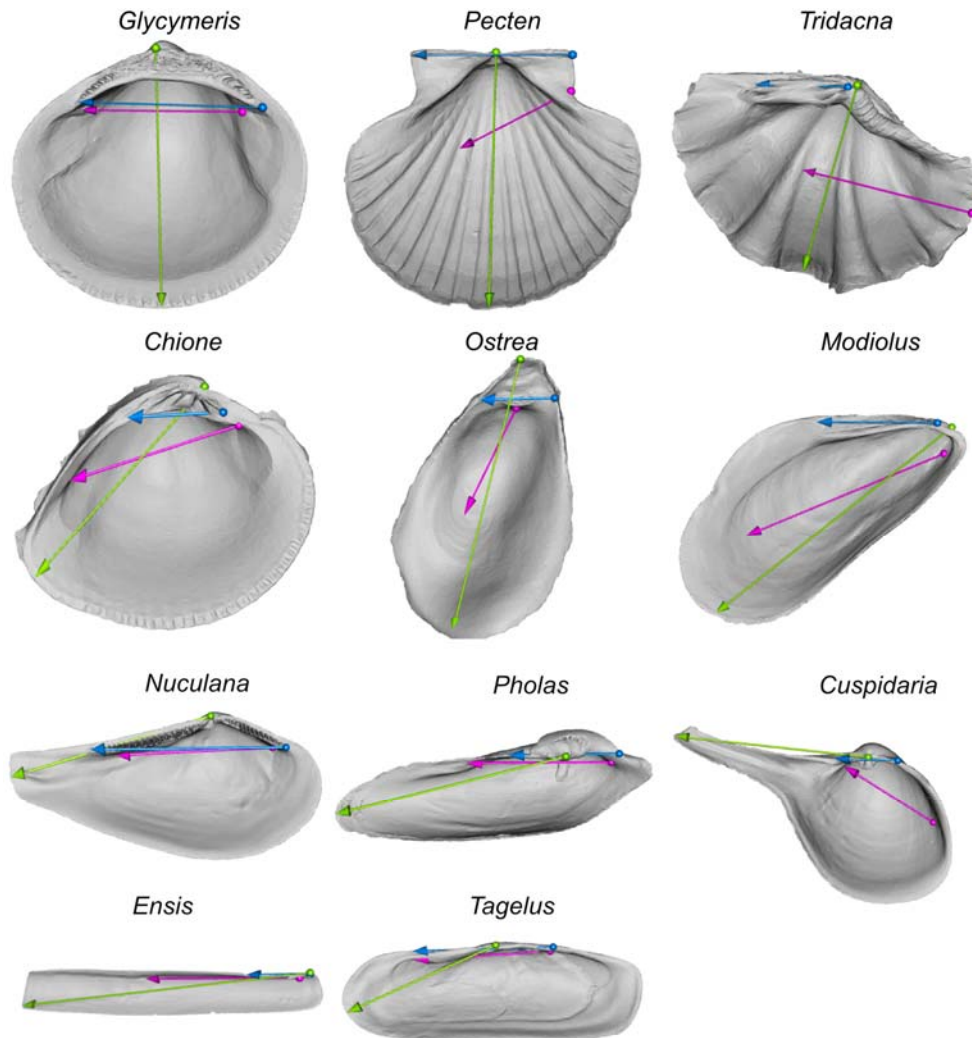

765

766 **Figure S1.** Placement of landmarks for axes (blue = hinge line; green = growth axis; magenta =  
767 oro-anal axis). Origins of axis vectors as spheres, termini as arrowheads. For the hinge line and  
768 oro-anal axis, spheres are anterior and arrowheads are posterior. For the growth axis, spheres  
769 mark the beak and arrowhead the farthest linear distance from the beak to a point on the  
770 commissure.

## 771 S2.2. Fitting the commissural plane

1. Equidistant landmarks sampled around commissure (black points). Centroid of commissure points determined (red point).
2. Determine cross product of successive vectors that start at the centroid of the commissure and end at successive points on the commissure. One example shown here.
3. Resulting normal vectors across the commissure.
4. Find mean normal vector and use as pole to the plane defining commissural plane. Plane may not rest strictly on the edges of the commissure if gapes are present, as is the case for this valve of *Pholas*.

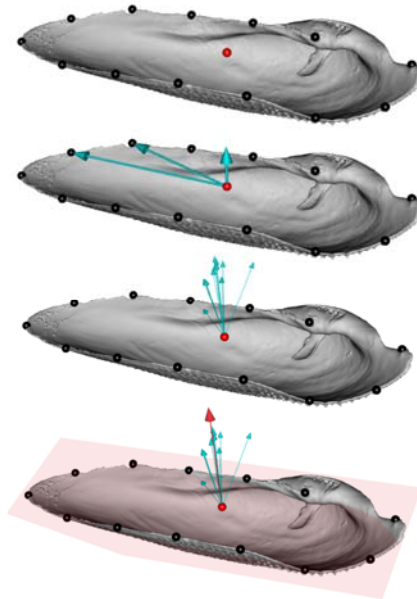

772  
773 **Figure S2.** Visualization of procedure for fitting the commissural plane.

## 774 S2.3. Landmarking the interior surface of the shell

775 First, the triangular surface mesh of the shell is 'cut' into two pieces using the commissure  
776 curve: (1) interior (facing the commissural plane, or proximally directed on the sagittal axis) and  
777 (2) exterior (facing away from the commissural plane, or distally directed on the sagittal axis);  
778 visualization and step-by-step details in Figure S3.

779 Then, equidistant surface semilandmarks are placed on the 'interior' surface of the shell  
780 mesh as described in Figure S4 (inspired by the eigensurface method of Polly and MacLeod  
781 2008). Note that in Figure S4-Step 5, sorting points on a flat surface best handles the ordering of  
782 points on the often topographically complex and recurved surfaces, which, in our experience,  
783 confound sorting in three-dimensions. This process is imperfect, but, again, in our experience,  
784 more reliably captures the morphology of shell surfaces compared to atlas-based approaches  
785 (Schlager 2017; Bardua et al. 2019). Bardua et al. (2019:22) state: "more accurate placement of  
786 surface points is a far more biologically sound characterization of morphology than spurious  
787 placement"—which is why we used the gridded approach in Figure S4 to place the initial  
788 semilandmarks. After placement, the equidistant semilandmarks on each individual are slid to  
789 minimize their thin-plate spline (TPS) bending energy to the mean Procrustes shape (Gunz et al.  
790 2005; Gunz and Mitteroecker 2013; implemented via *Morpho::slider3d* Schlager 2017). The

791 start point of the commissure curve and the orientation of the surface semilandmark grid depend  
792 on the orientation scheme:

- 793
- 794 ● For the commissure orientation (SX-COMM), the initial and 'fixed' (i.e. non-sliding)  
795 point of the 50-point, equidistant commissure curve is the point nearest the beak  
796 (Figure S5e). The other 49 semilandmarks along the commissure curve are then slid to  
797 minimize their TPS bending energy. The surface semilandmark grid is laid down at 5%  
798 distances along an arbitrary sampling axis that spans the 13th and 38th sliding  
799 semilandmarks on the commissure curve, which generally reflect the anterior and  
800 posterior directions, respectively. The outermost grid points that intersect the commissure  
801 of the valve are removed because they will be replaced by the sliding commissure  
802 semilandmarks in the final set. The semilandmark grid is then slid to minimize its TPS  
803 bending energy, using the sliding semilandmarks on the commissure curve to constrain  
804 the sliding of the surface semilandmarks. All sliding semilandmarks are constrained to lie  
805 on the mesh surface. Thus, the final landmark set consists of 50 sliding semilandmarks  
806 along the commissure and 380 sliding semilandmarks on the interior surface of the shell,  
807 totaling 430 sliding semilandmarks.
  - 808 ● For the oro-anal axis orientation (SX-OAX-oOAX), the initial and 'fixed' point of the 50-  
809 point, equidistant commissure curve is the point that forms the smallest angle between the  
810 orthogonal oro-anal axis vector and a vector originating at the centroid of the commissure  
811 curve and terminating at a point along it (Figure S5b). The aim is to reduce the impact of  
812 the beak position on the shape of the shell, that is, to remove the effects of shell growth  
813 on comparisons on its shapes. The sampling axis for the surface semilandmarks is the  
814 oro-anal axis. The commissure curve and surface semilandmarks are slid as above.
  - 815 ● For the orientations that include the hinge line (SX-HL-oHL, SX-HL-GX, and SX-HL-  
816 GX-OAX), the initial and 'fixed' point of the 50-point, equidistant commissure curve is  
817 the point that forms the smallest angle between the orthogonal hinge line vector and a  
818 vector originating at the centroid of the commissure curve and terminating at a point  
819 along it (Figure S5a,c,d). The aim is the same as for the oro-anal axis above, and the  
820 semilandmarks are slid as in the SX-COMM case above.

1. Landmark the shell commissure. Points are ordered counter-clockwise, starting at the point nearest the beak. Manually placed landmarks are upsampled to 250 equally spaced points using a 3D-spline.
2. Use Dijkstra's algorithm to determine the shortest path between vertices on the mesh nearest the commissure landmarks (blue line connected edges on mesh between the green points).

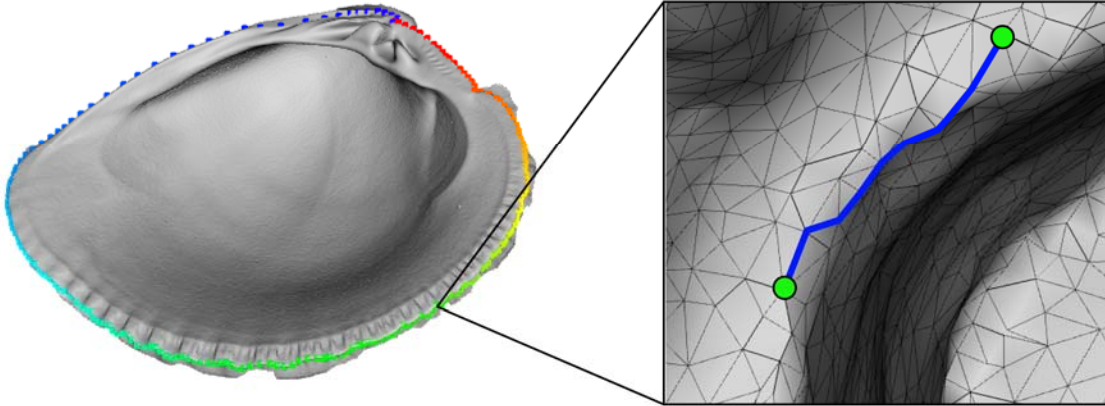

3. Temporarily remove faces from the mesh that contain the vertices connecting the blue line. This separates the mesh into two parts, which can then be partitioned into interior (gray) and exterior (orange) meshes.
4. Once separated, the temporarily removed faces along the commissure are added back to both meshes to make the 'cut' seamless.

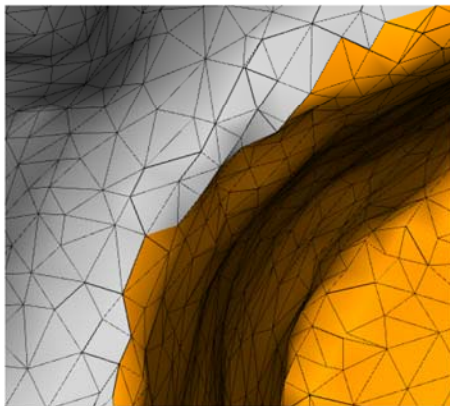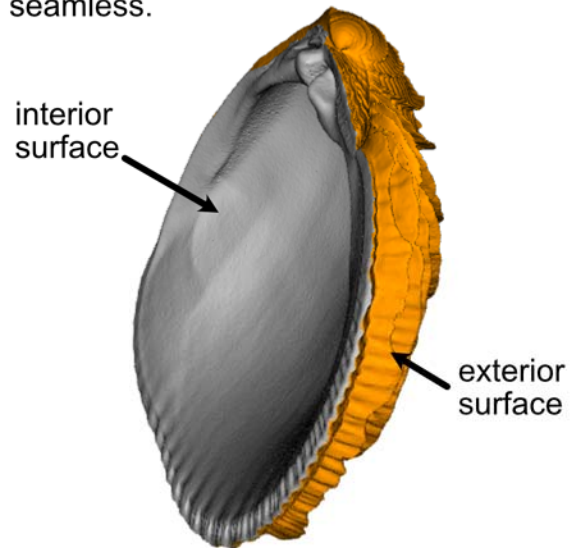

821

822 **Figure S3.** Visualization of the process for separating, or 'cutting,' shell meshes into interior and  
823 exterior surfaces.



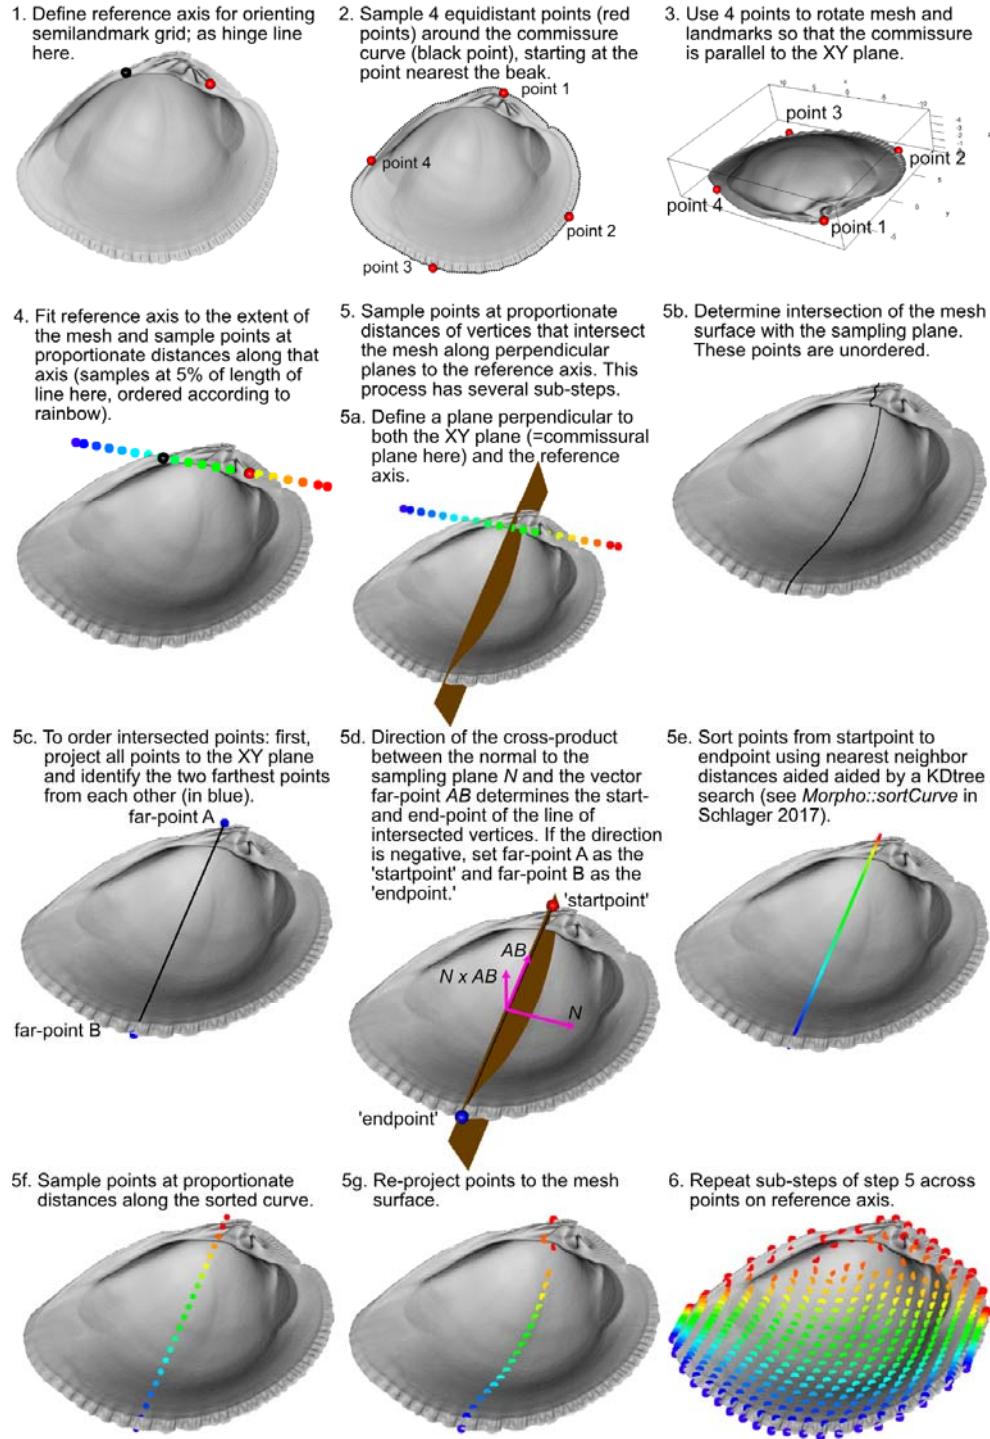

824

825 **Figure S4.** Visualization of the process for placing equidistant surface semilandmarks on the  
 826 interior surface of the shell.

### Variation in starting points of the commissure curve and orientation of the surface landmarks

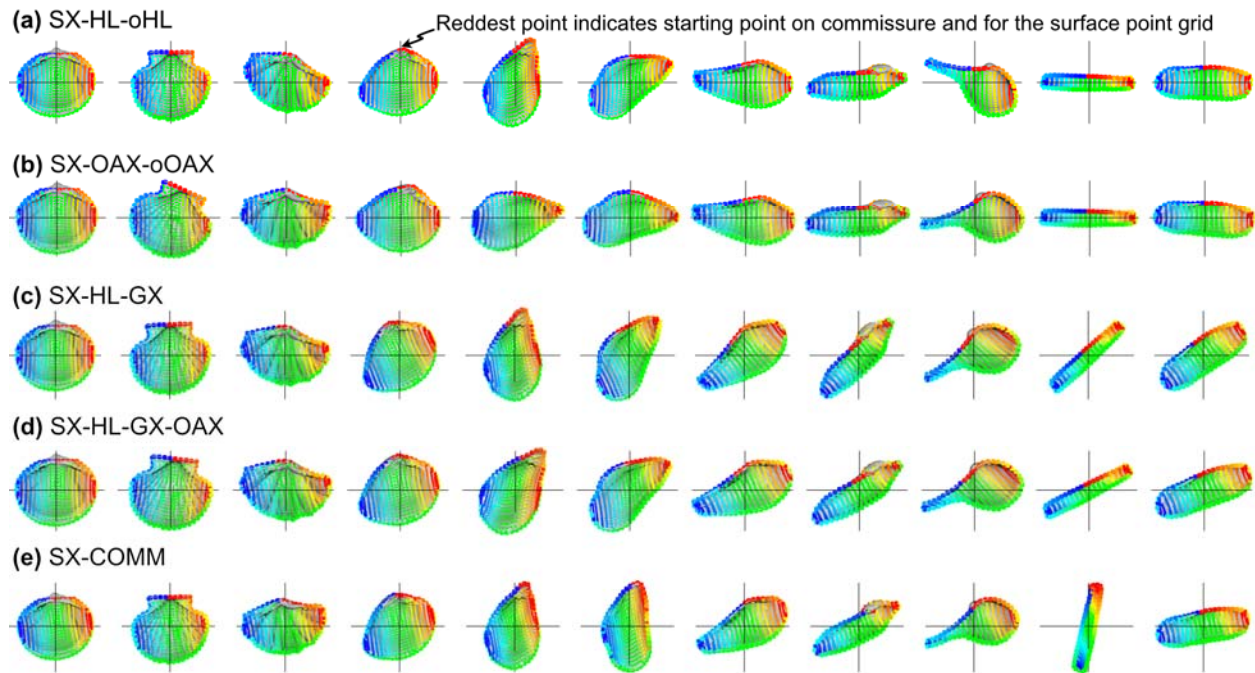

827

828 **Figure S5.** Placement of sliding semilandmarks along the commissure curve and the interior  
829 surface of the shell depending on orientation scheme. All landmark sets in this figure are scaled  
830 by the centroid size of the shell points and translated to the centroid of the shell commissure.  
831 Rainbow colored points indicate point order, with the most saturated red and blue as the  
832 respective initial and terminal points. (a) Commissure curve begins at the point that forms the  
833 smallest angle between the orthogonal hinge line vector and a vector originating at the centroid  
834 of the commissure curve and terminating at a point along it. Surface semilandmarks are oriented  
835 orthogonal to the hinge line. (b) Commissure curve begins at the point that forms the smallest  
836 angle between the orthogonal oro-anal axis vector and a vector originating at the centroid of the  
837 commissure curve and terminating at a point along it. Surface semilandmarks are oriented  
838 orthogonal to the oro-anal axis. (c) Commissure curve and surface landmarks oriented as in panel  
839 a. (d) Commissure curve and surface landmarks oriented as in panel a. (e) Commissure curve  
840 begins as the point nearest the beak. Surface semilandmarks are oriented orthogonal to the line  
841 connecting the 13th and 38th sliding semilandmarks on the commissure curve, which generally  
842 reflect the anterior and posterior directions.

843 **S3. Supplemental Results**

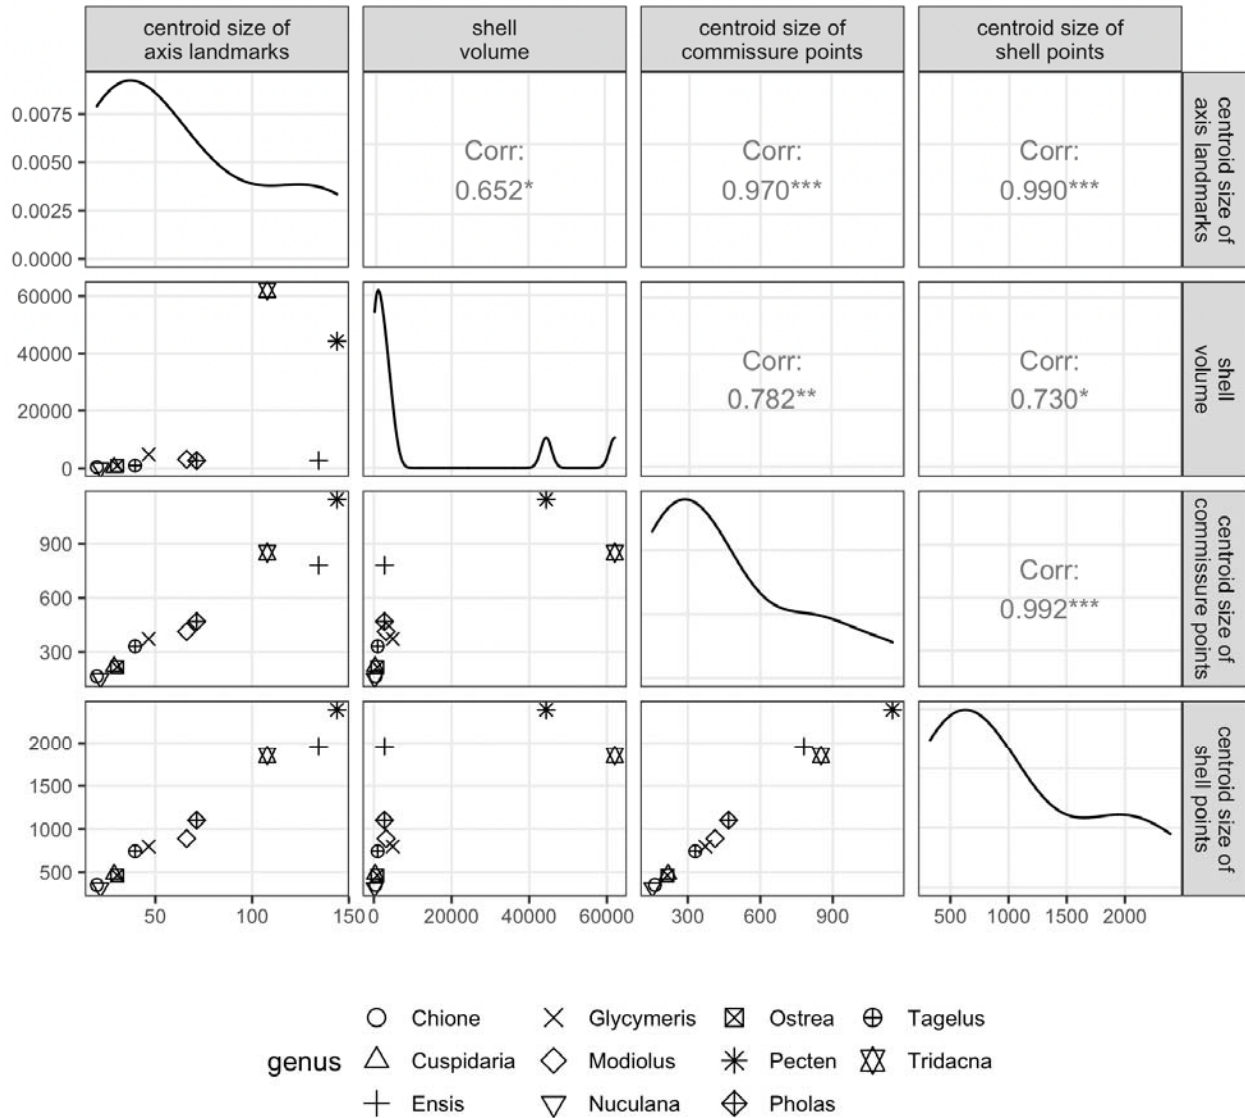

844

845 **Figure S6.** Correlations of size measures. Lower left triangle of the plot matrix shows the  
 846 pairwise, bivariate relationships of size measures among analyzed specimens. Diagonal of the  
 847 plot matrix shows density function for each size measure. Upper right triangle of the plot matrix  
 848 shows results of Pearson correlation tests, with asterisks denoting significance at the following *p*  
 849 levels: \* = 0.05, \*\* = 0.01, and \*\*\* = 0.001.

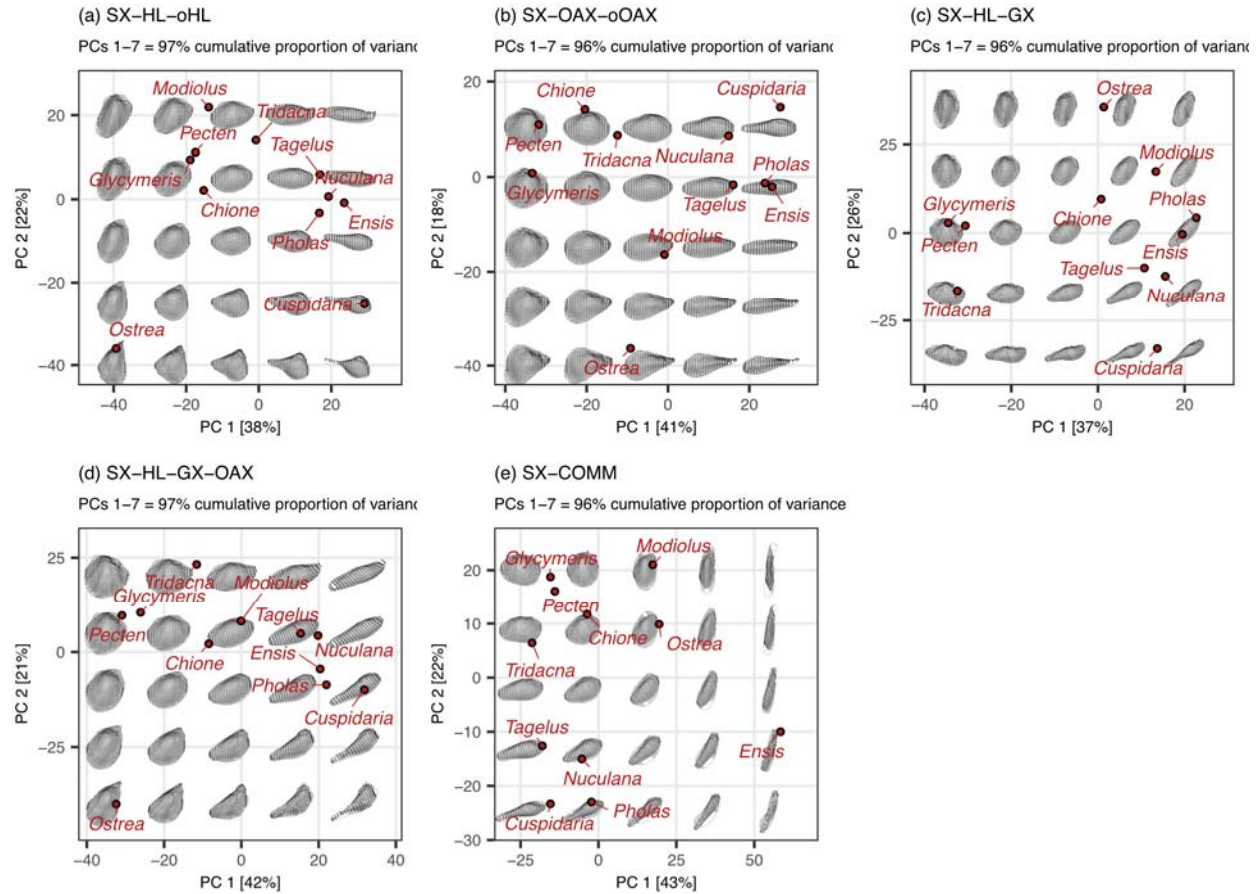

850

851 **Figure S7.** Principal components analysis of the aligned sliding semilandmarks on the  
852 commissure and interior surface of the shell. All landmark sets in this figure are scaled by the  
853 centroid size of the shell points and translated to the centroid of the shell commissure. Panels a-e  
854 give the positions of specimens on the first two principal components (PCs; percentages in  
855 brackets on each axis give the proportion of total variance explained by that axis). Images of  
856 shells are projections of the shapes at their given locations in the PC1-PC2 space. Holes in the  
857 mesh surfaces are artifacts of the meshing algorithm; the black points are the true underlying  
858 data.
